# Supplementary material
Source: publisher figshare collection journal article supplement (https://frontiersin.figshare.com/ndownloader/files/21957750)
Supplement: Supplementary file 1 [file 21957750]

### ***Supplementary data***

Appendix 1 Reconstructed tracks of tagged yellowfin tuna. The confidence region along an estimated position is indicated by grey-shaded ellipses. Positions are color-coded by months. Tagging locations, green triangle; last known fish locations, red triangle.



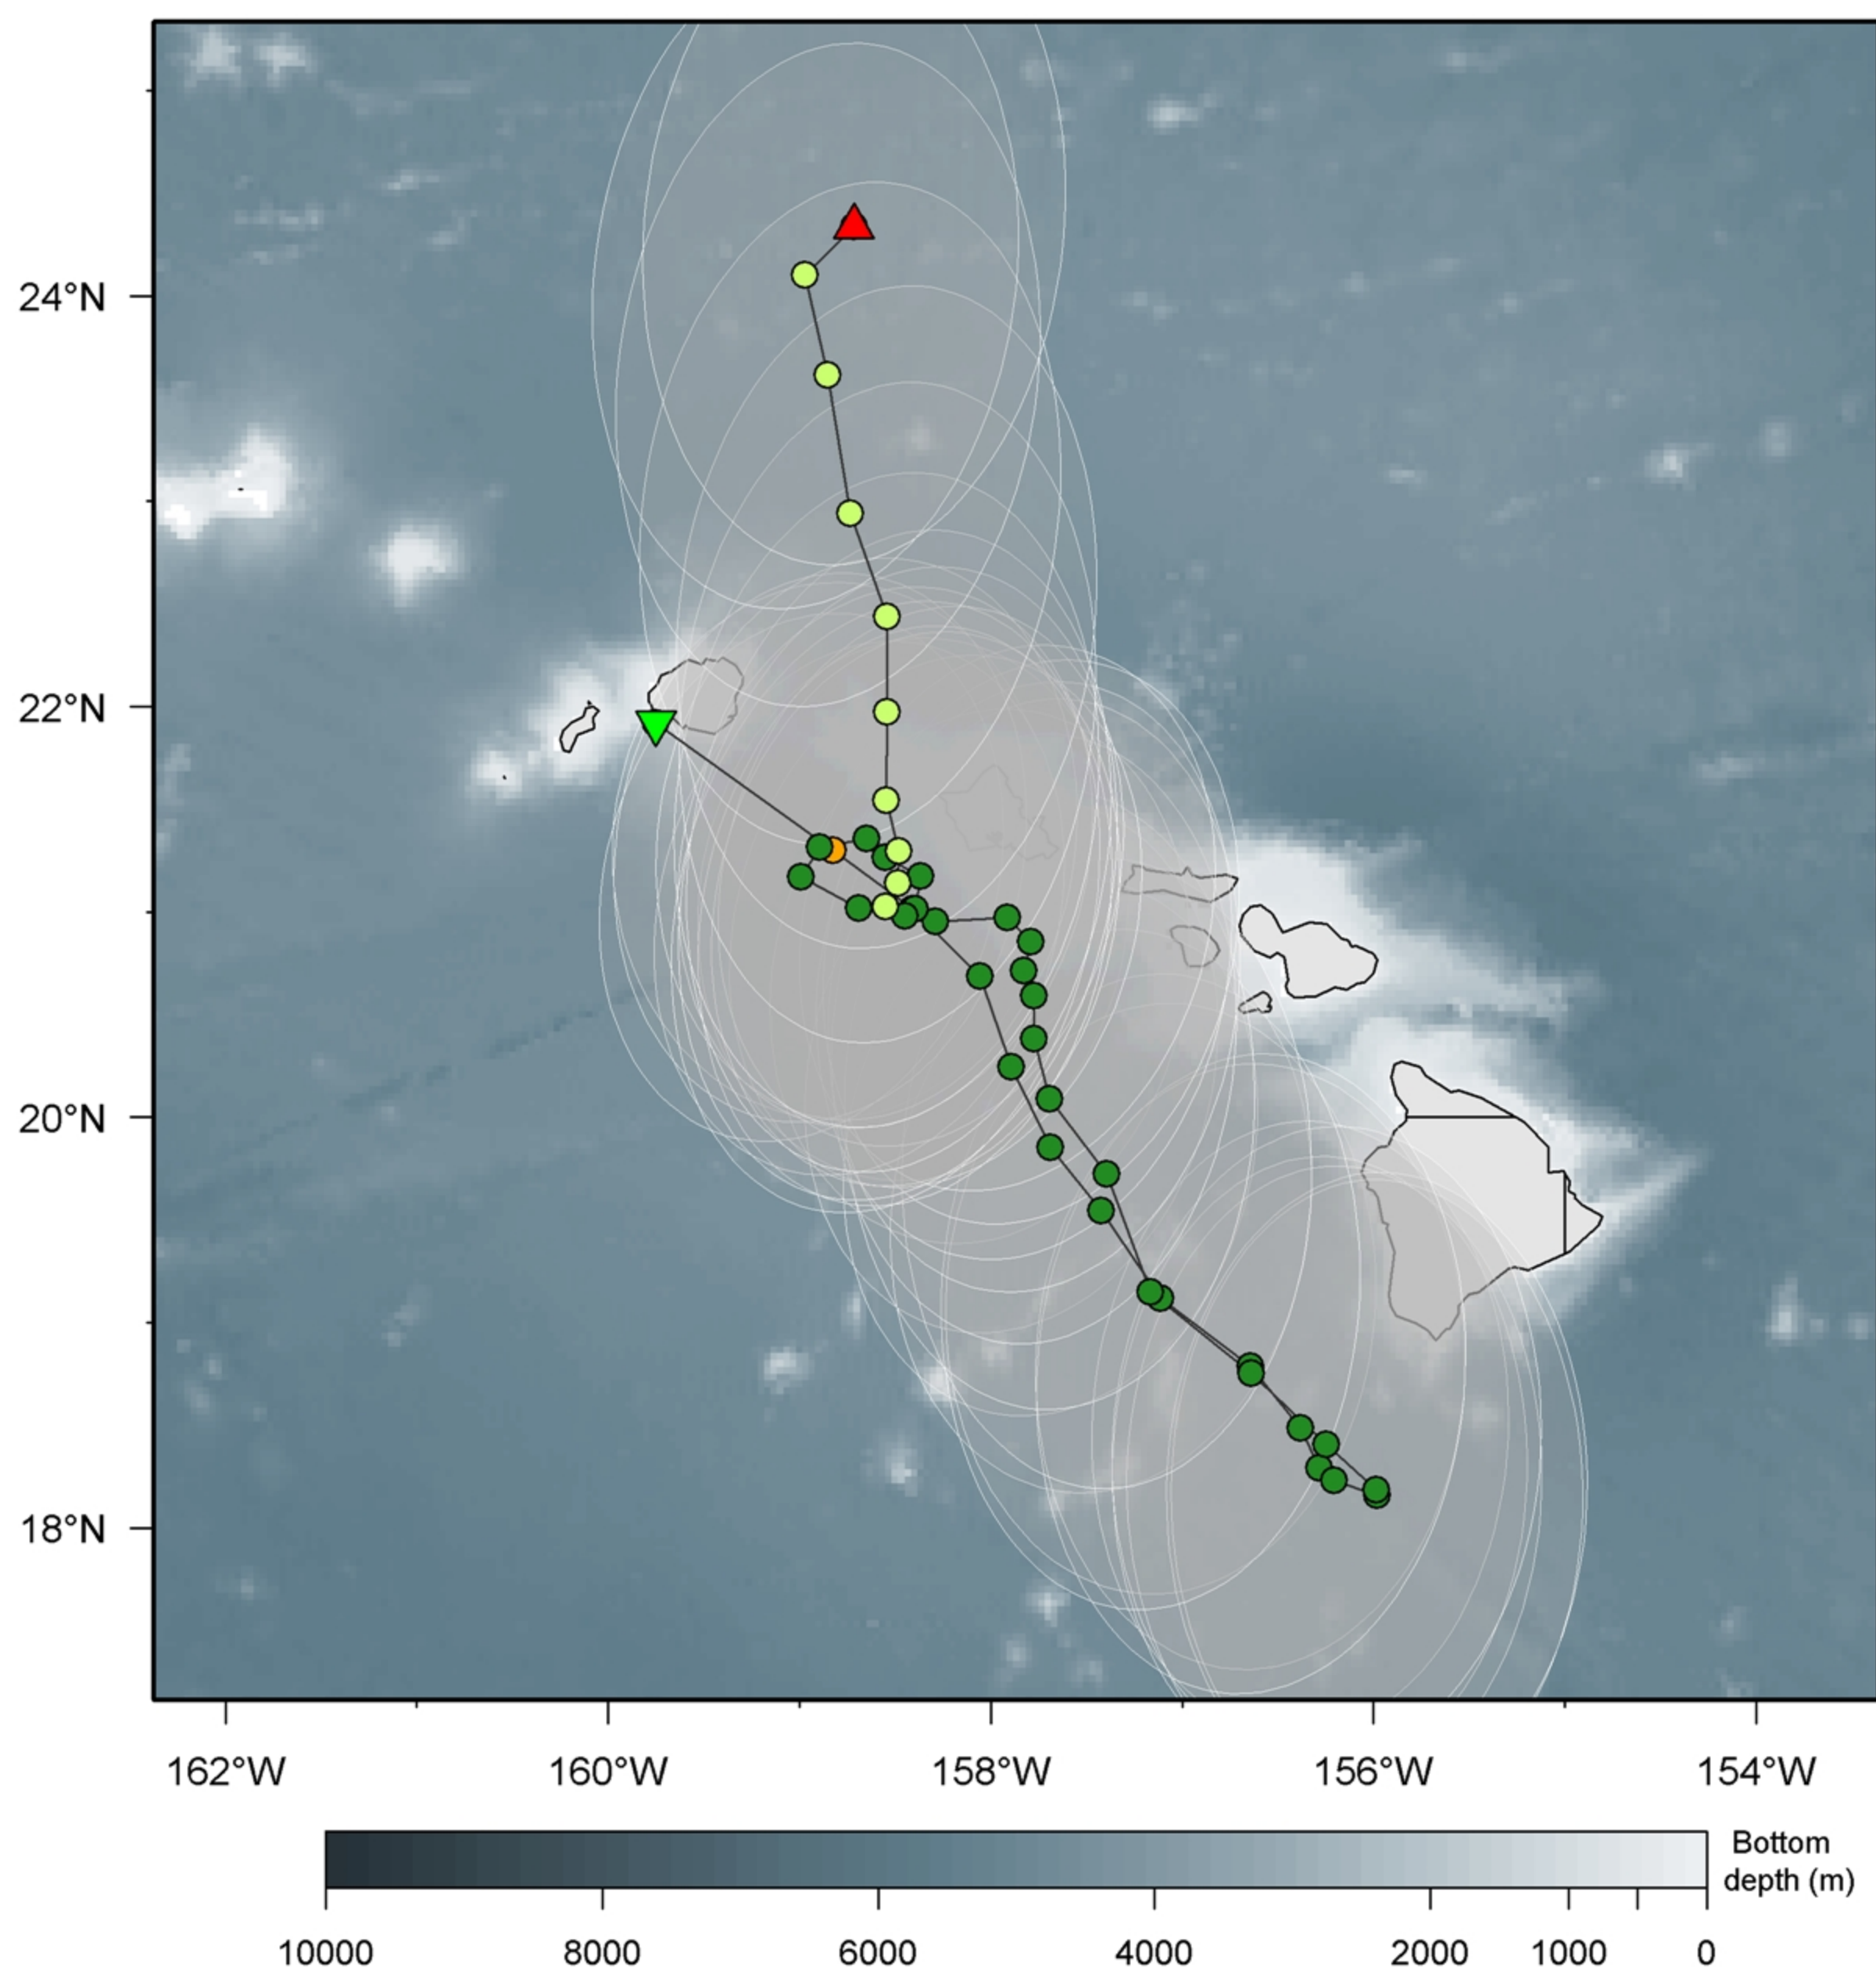

YFT.Tag02.14P0150.136559-ci

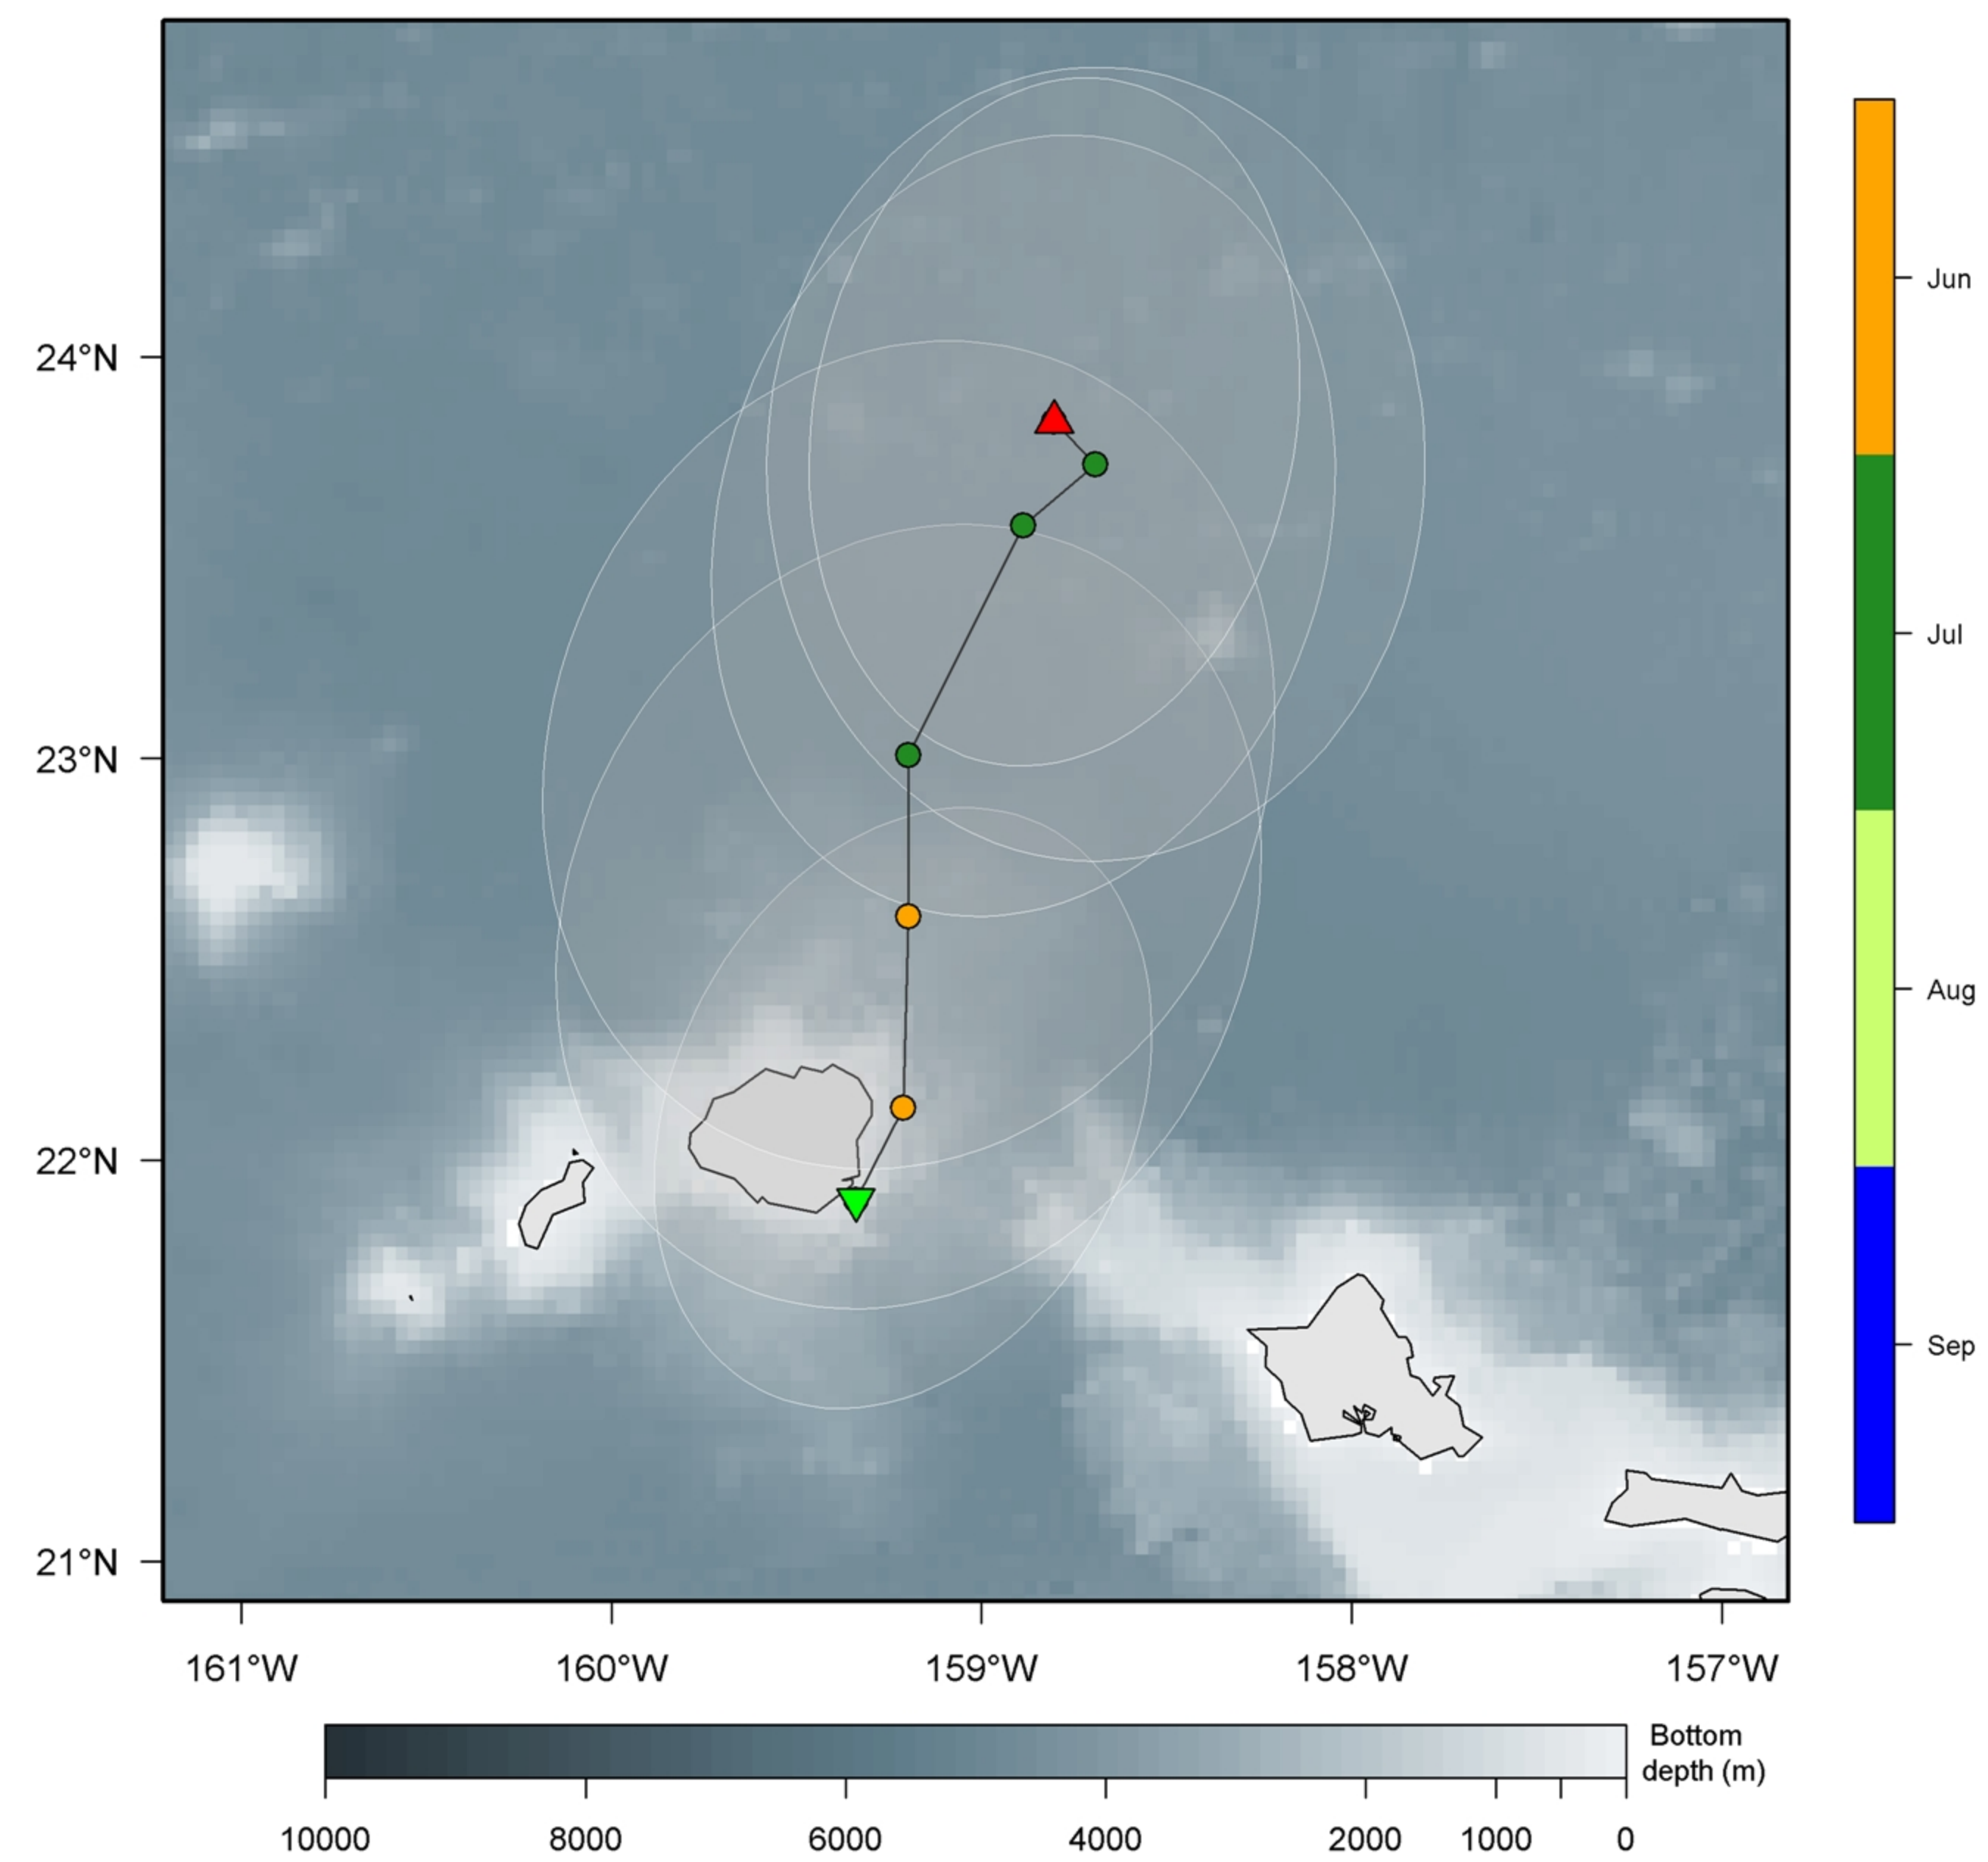

YFT.Tag03.14P0152.136560-ci

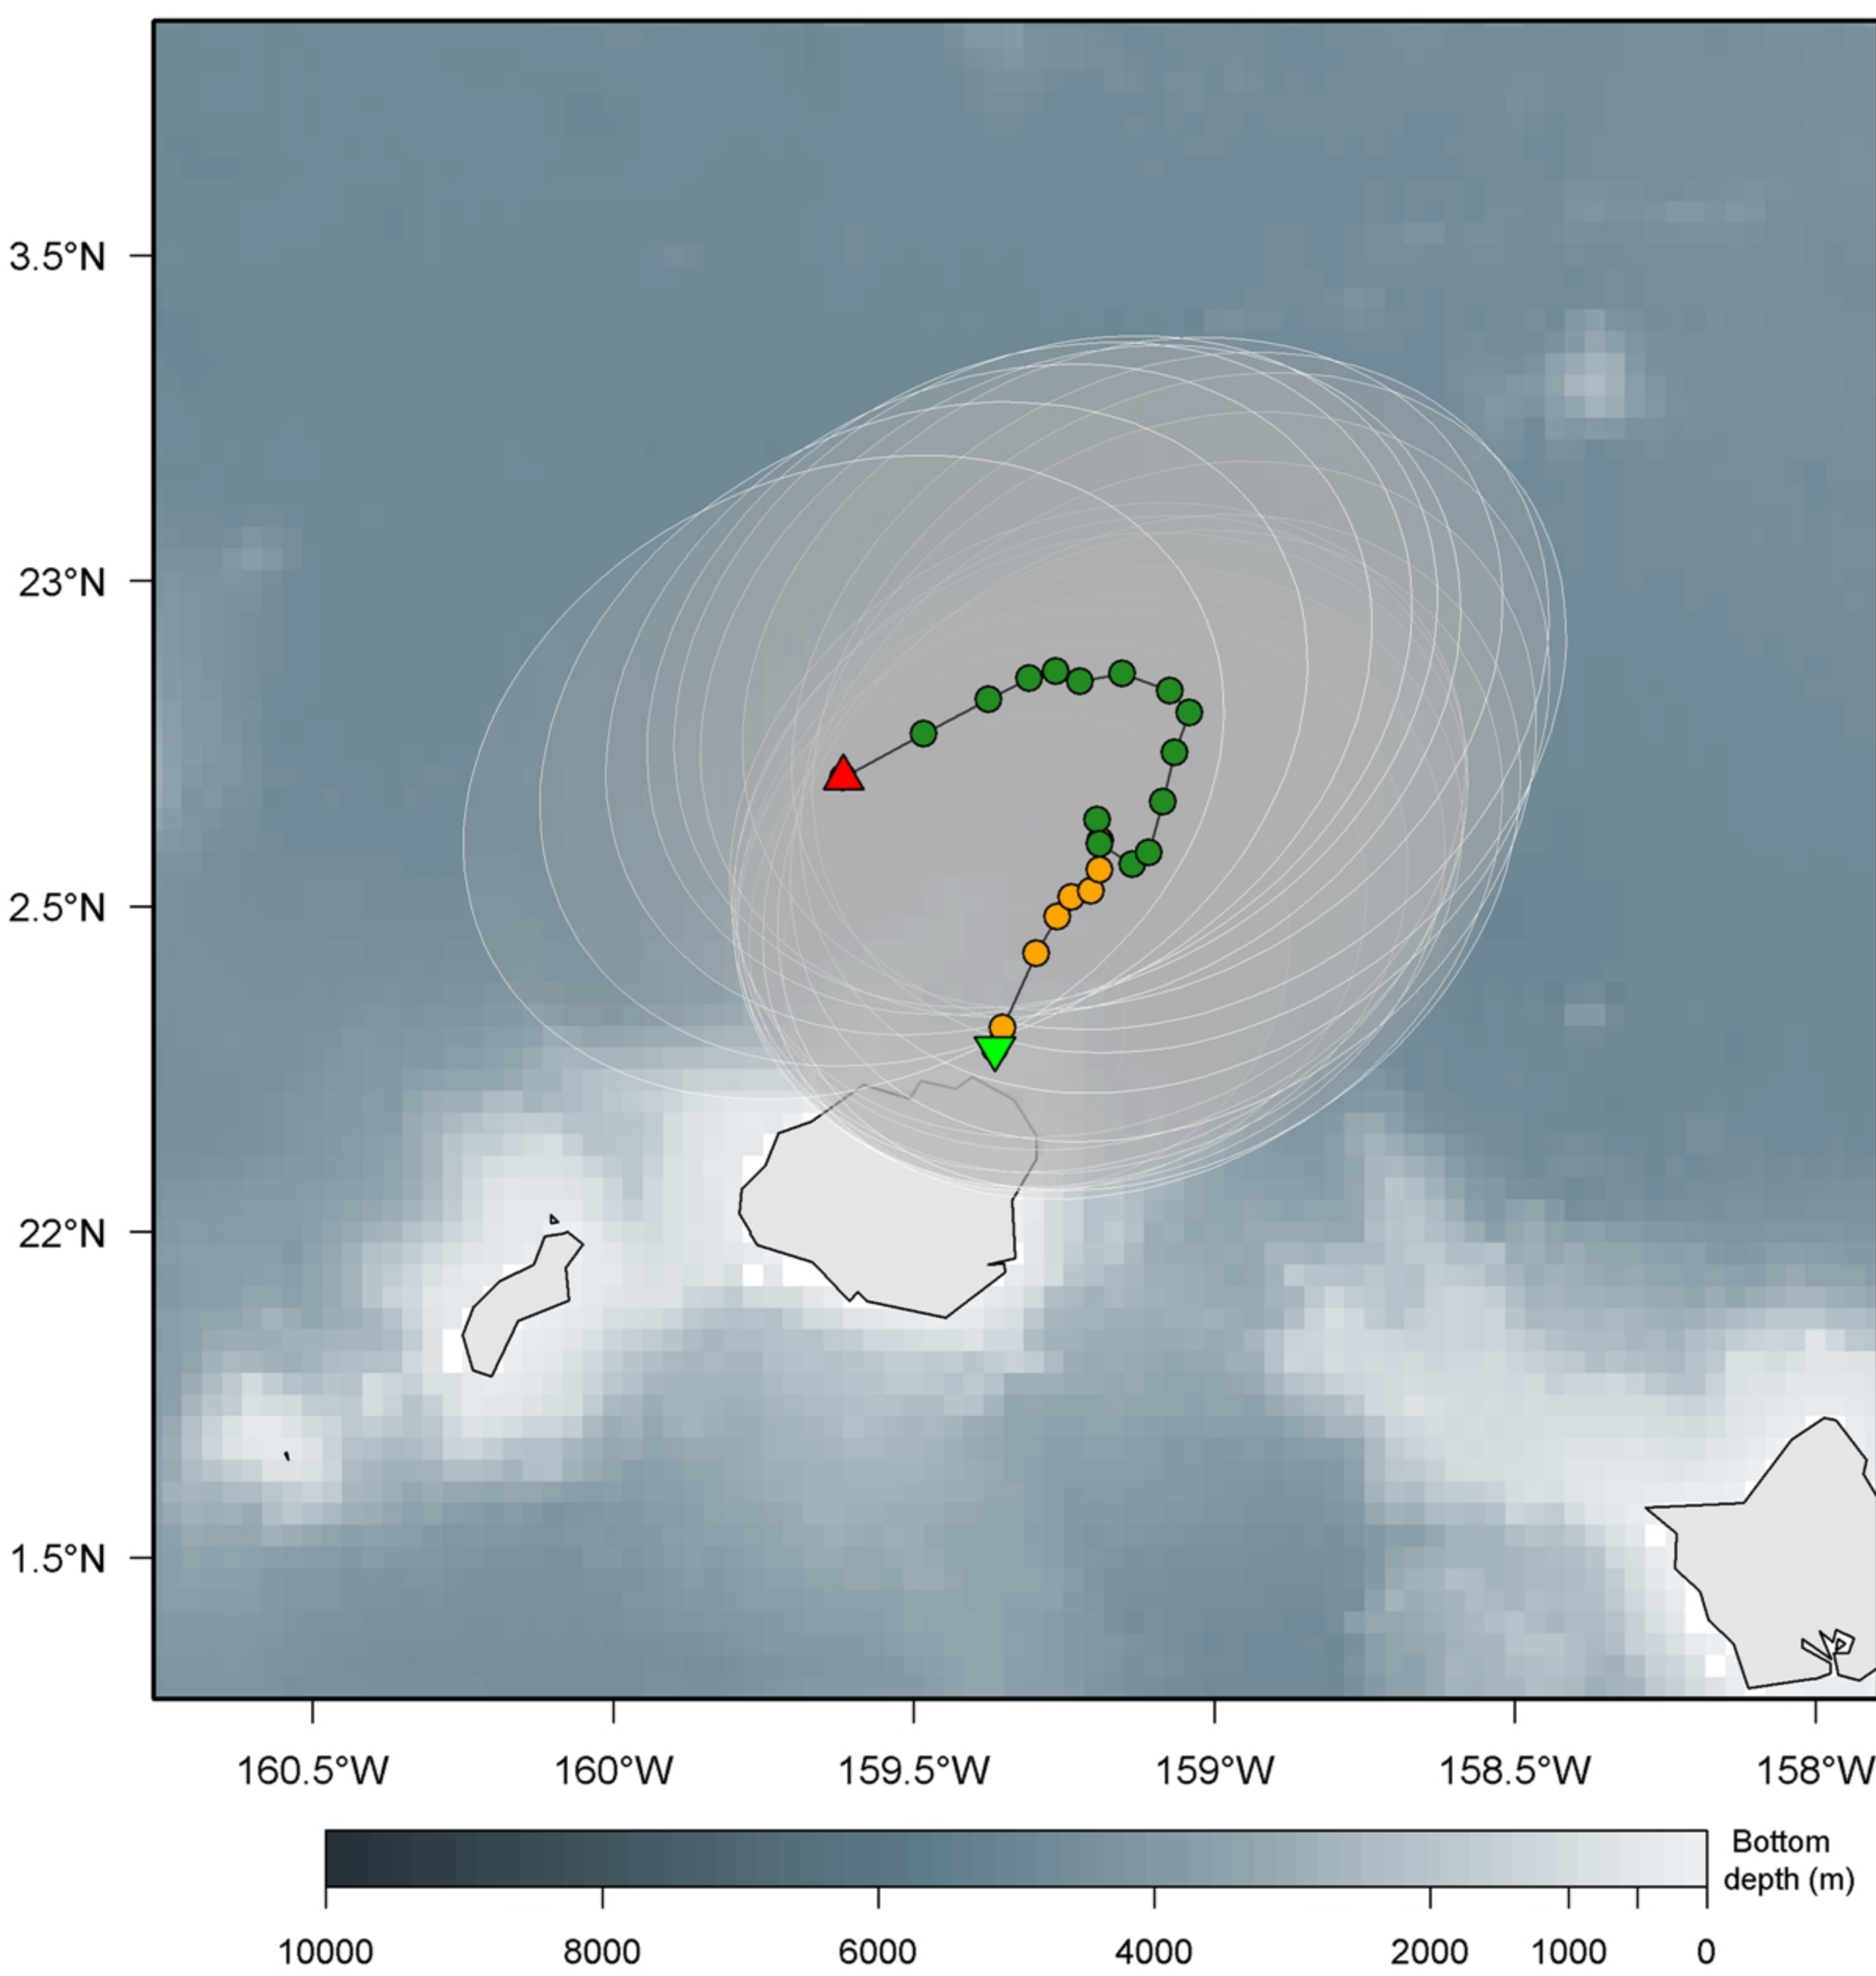

YFT.Tag04.15P1147.142394-ci

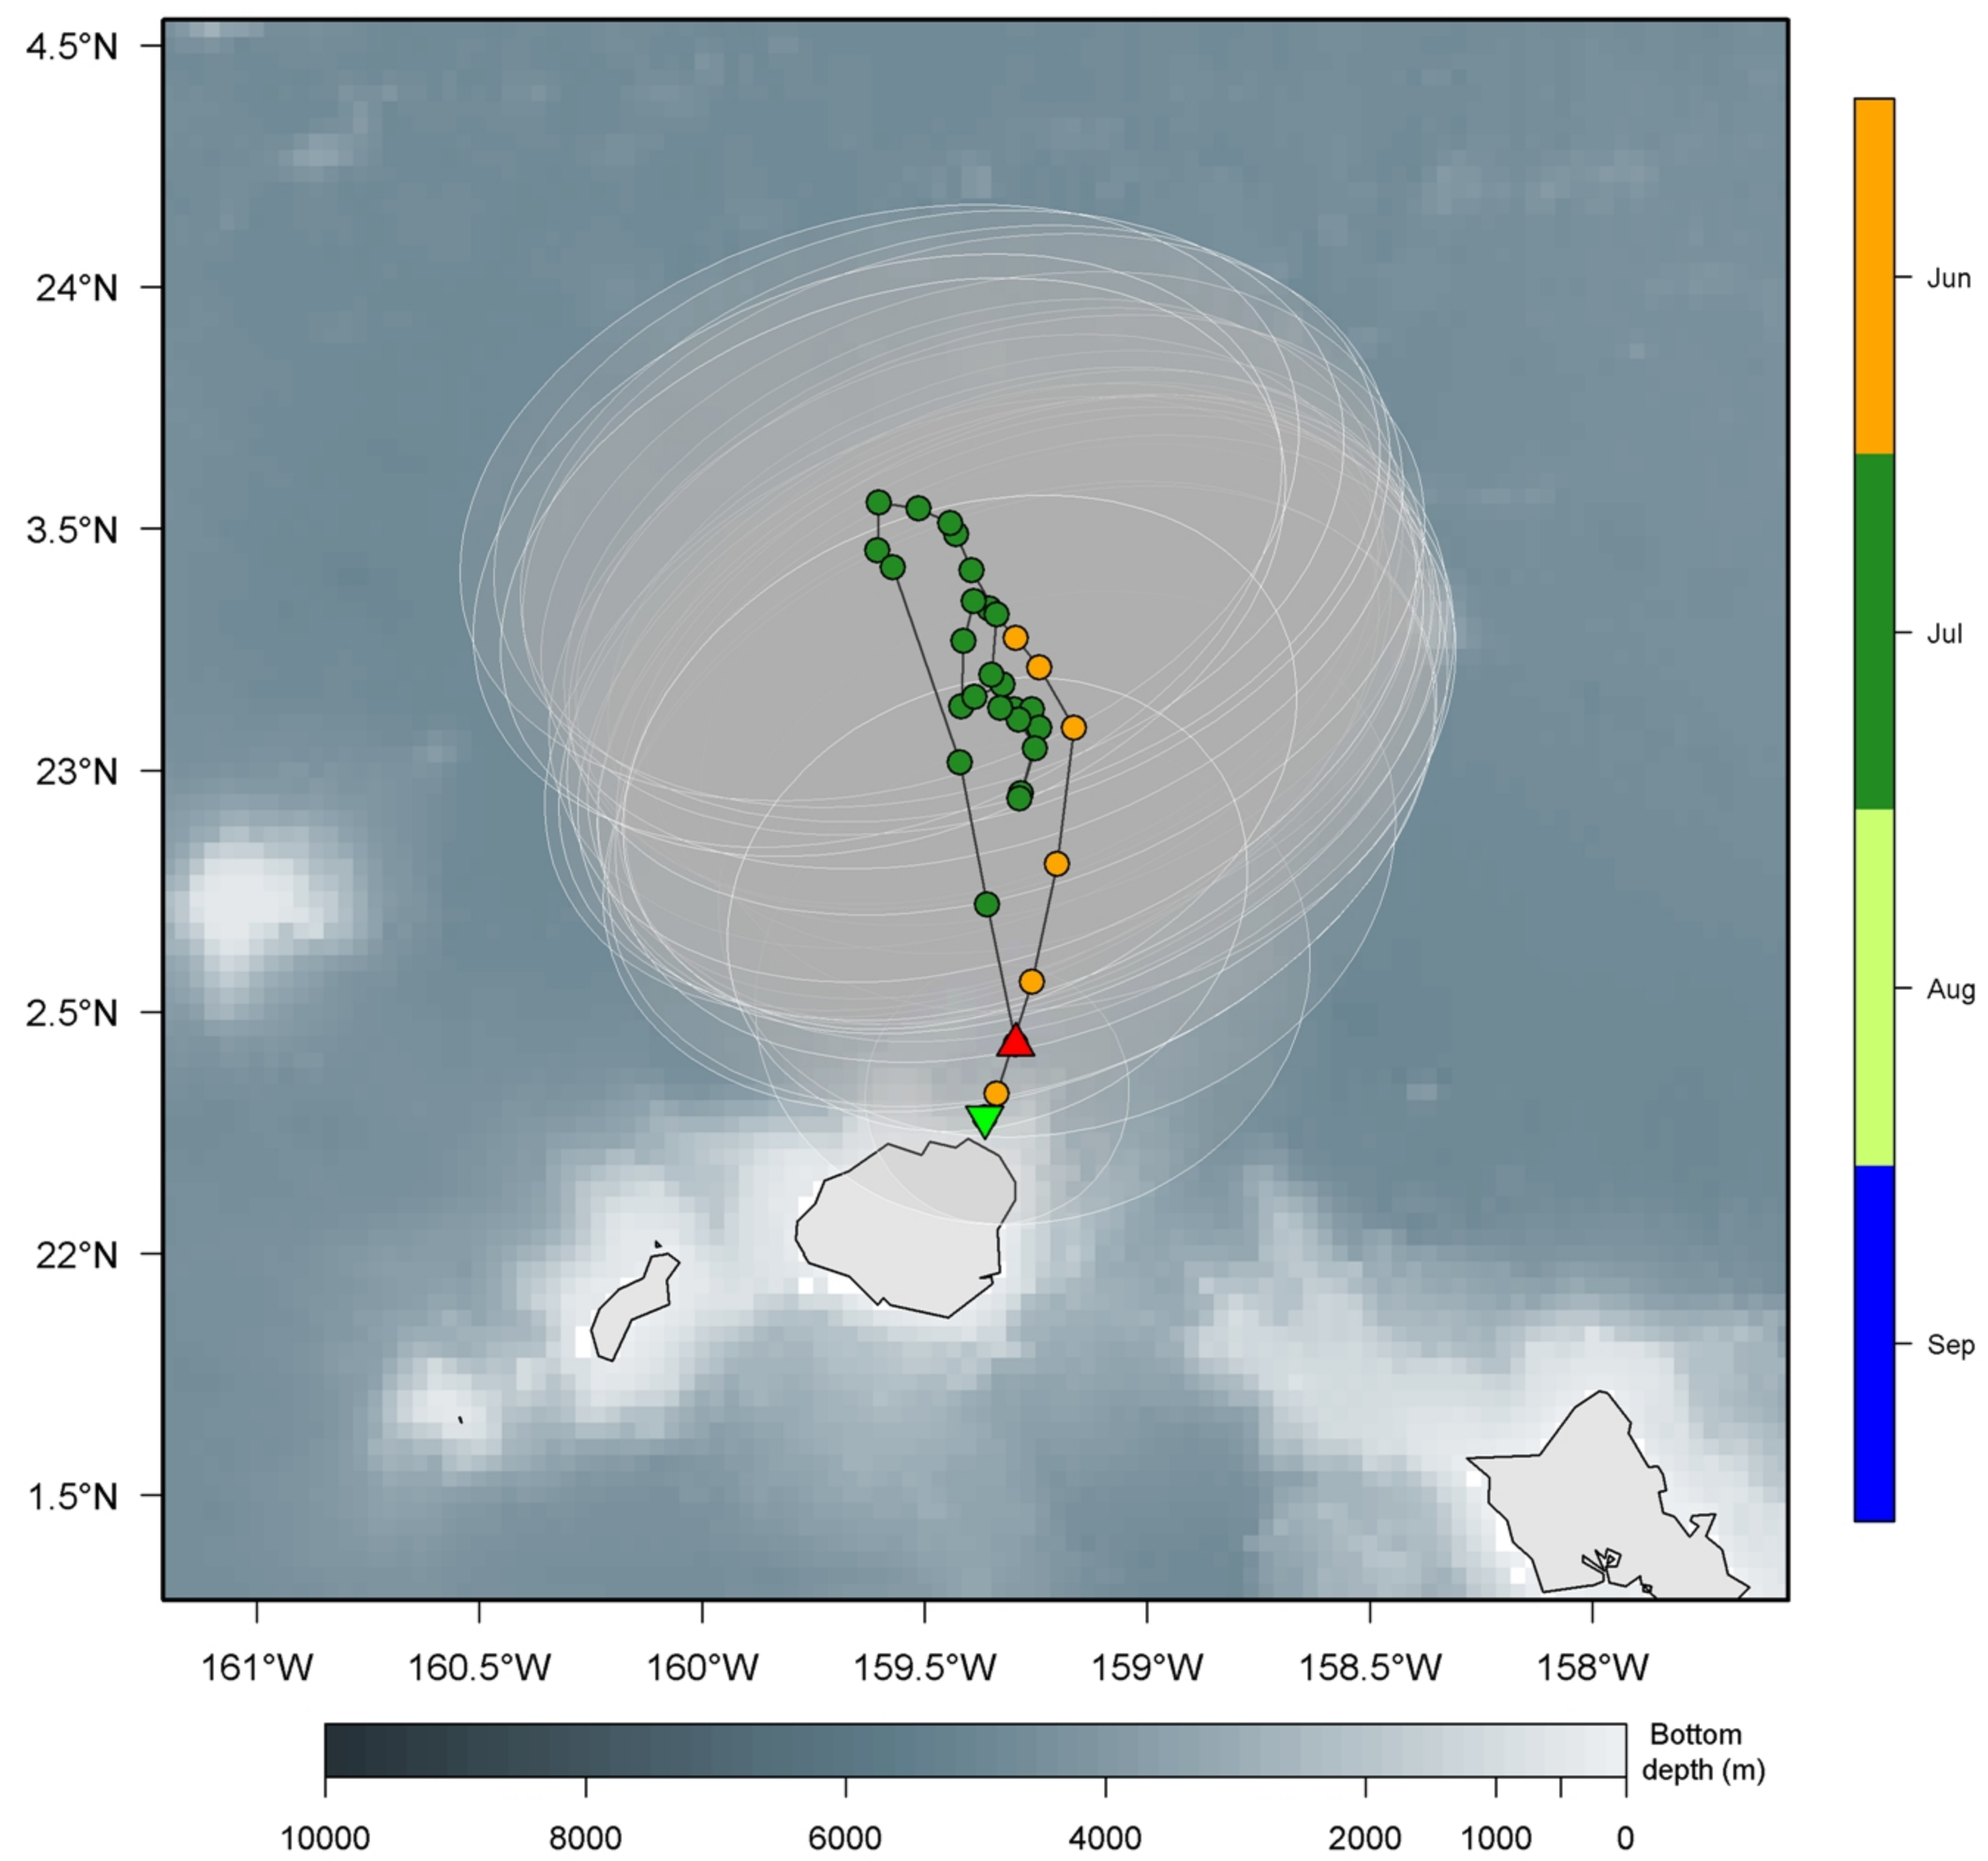

YFT.Tag05.15P1034.136567-ci



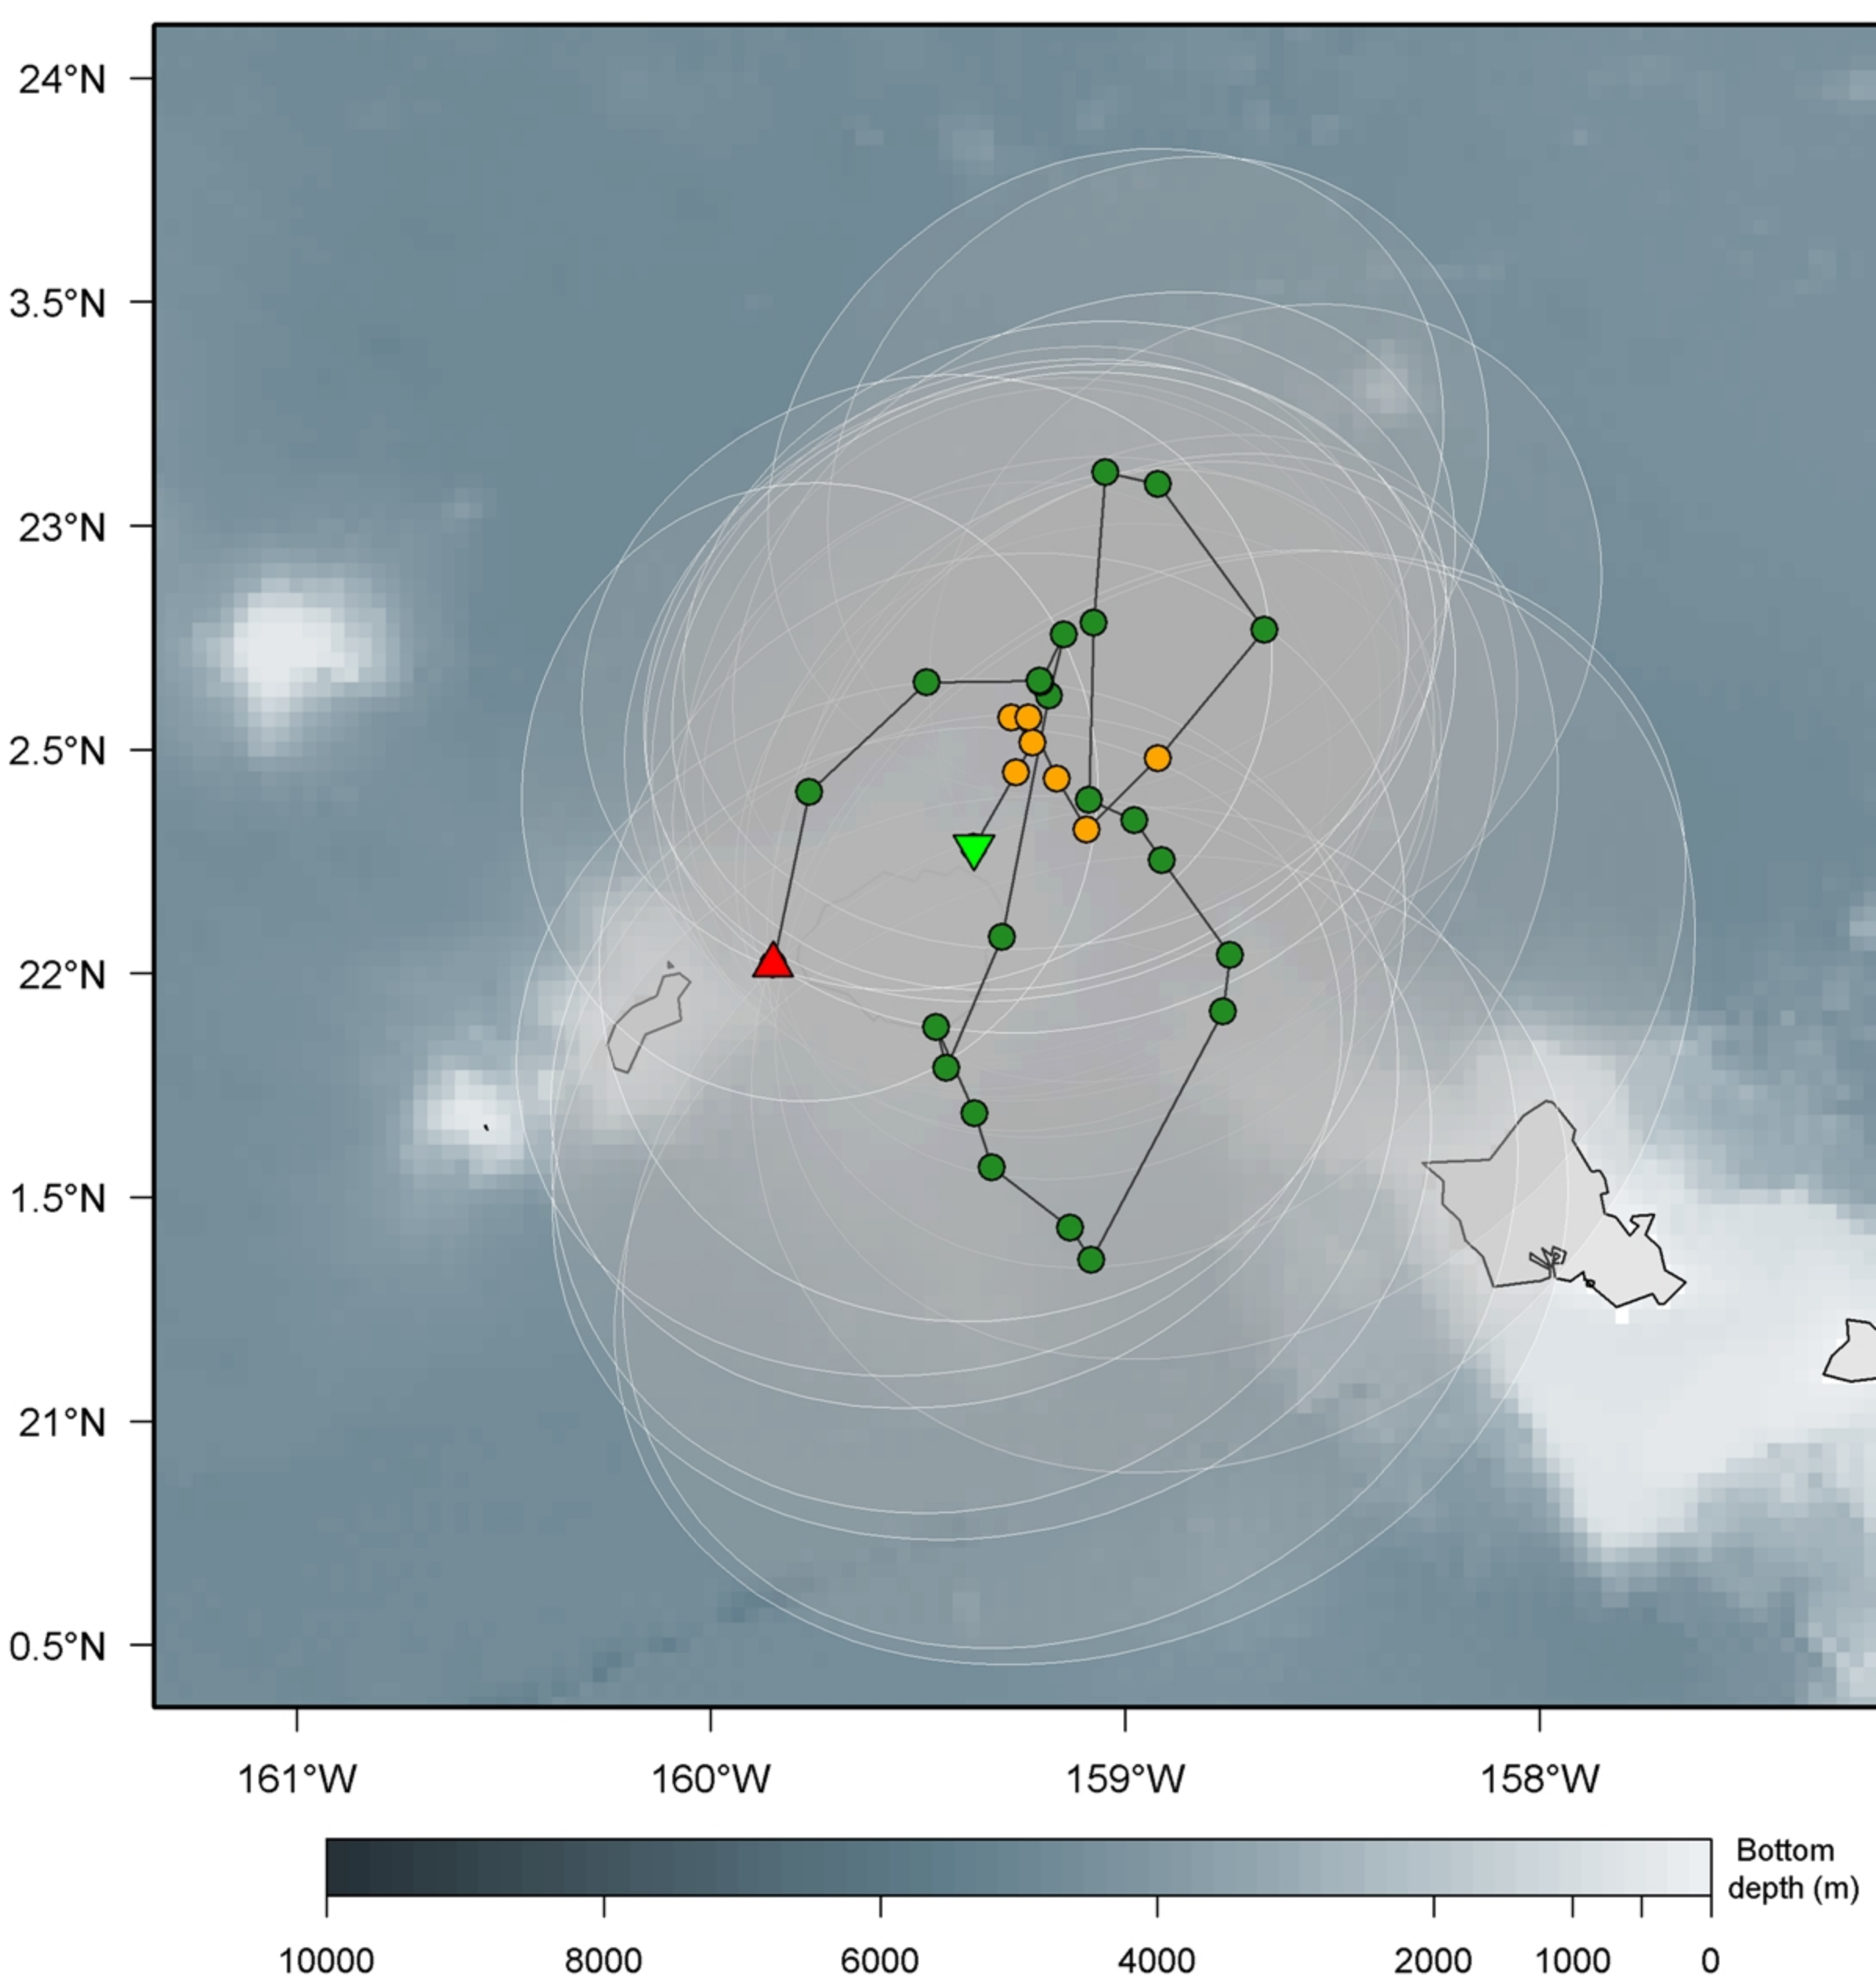

YFT.Tag06.15P1041.142392-ci

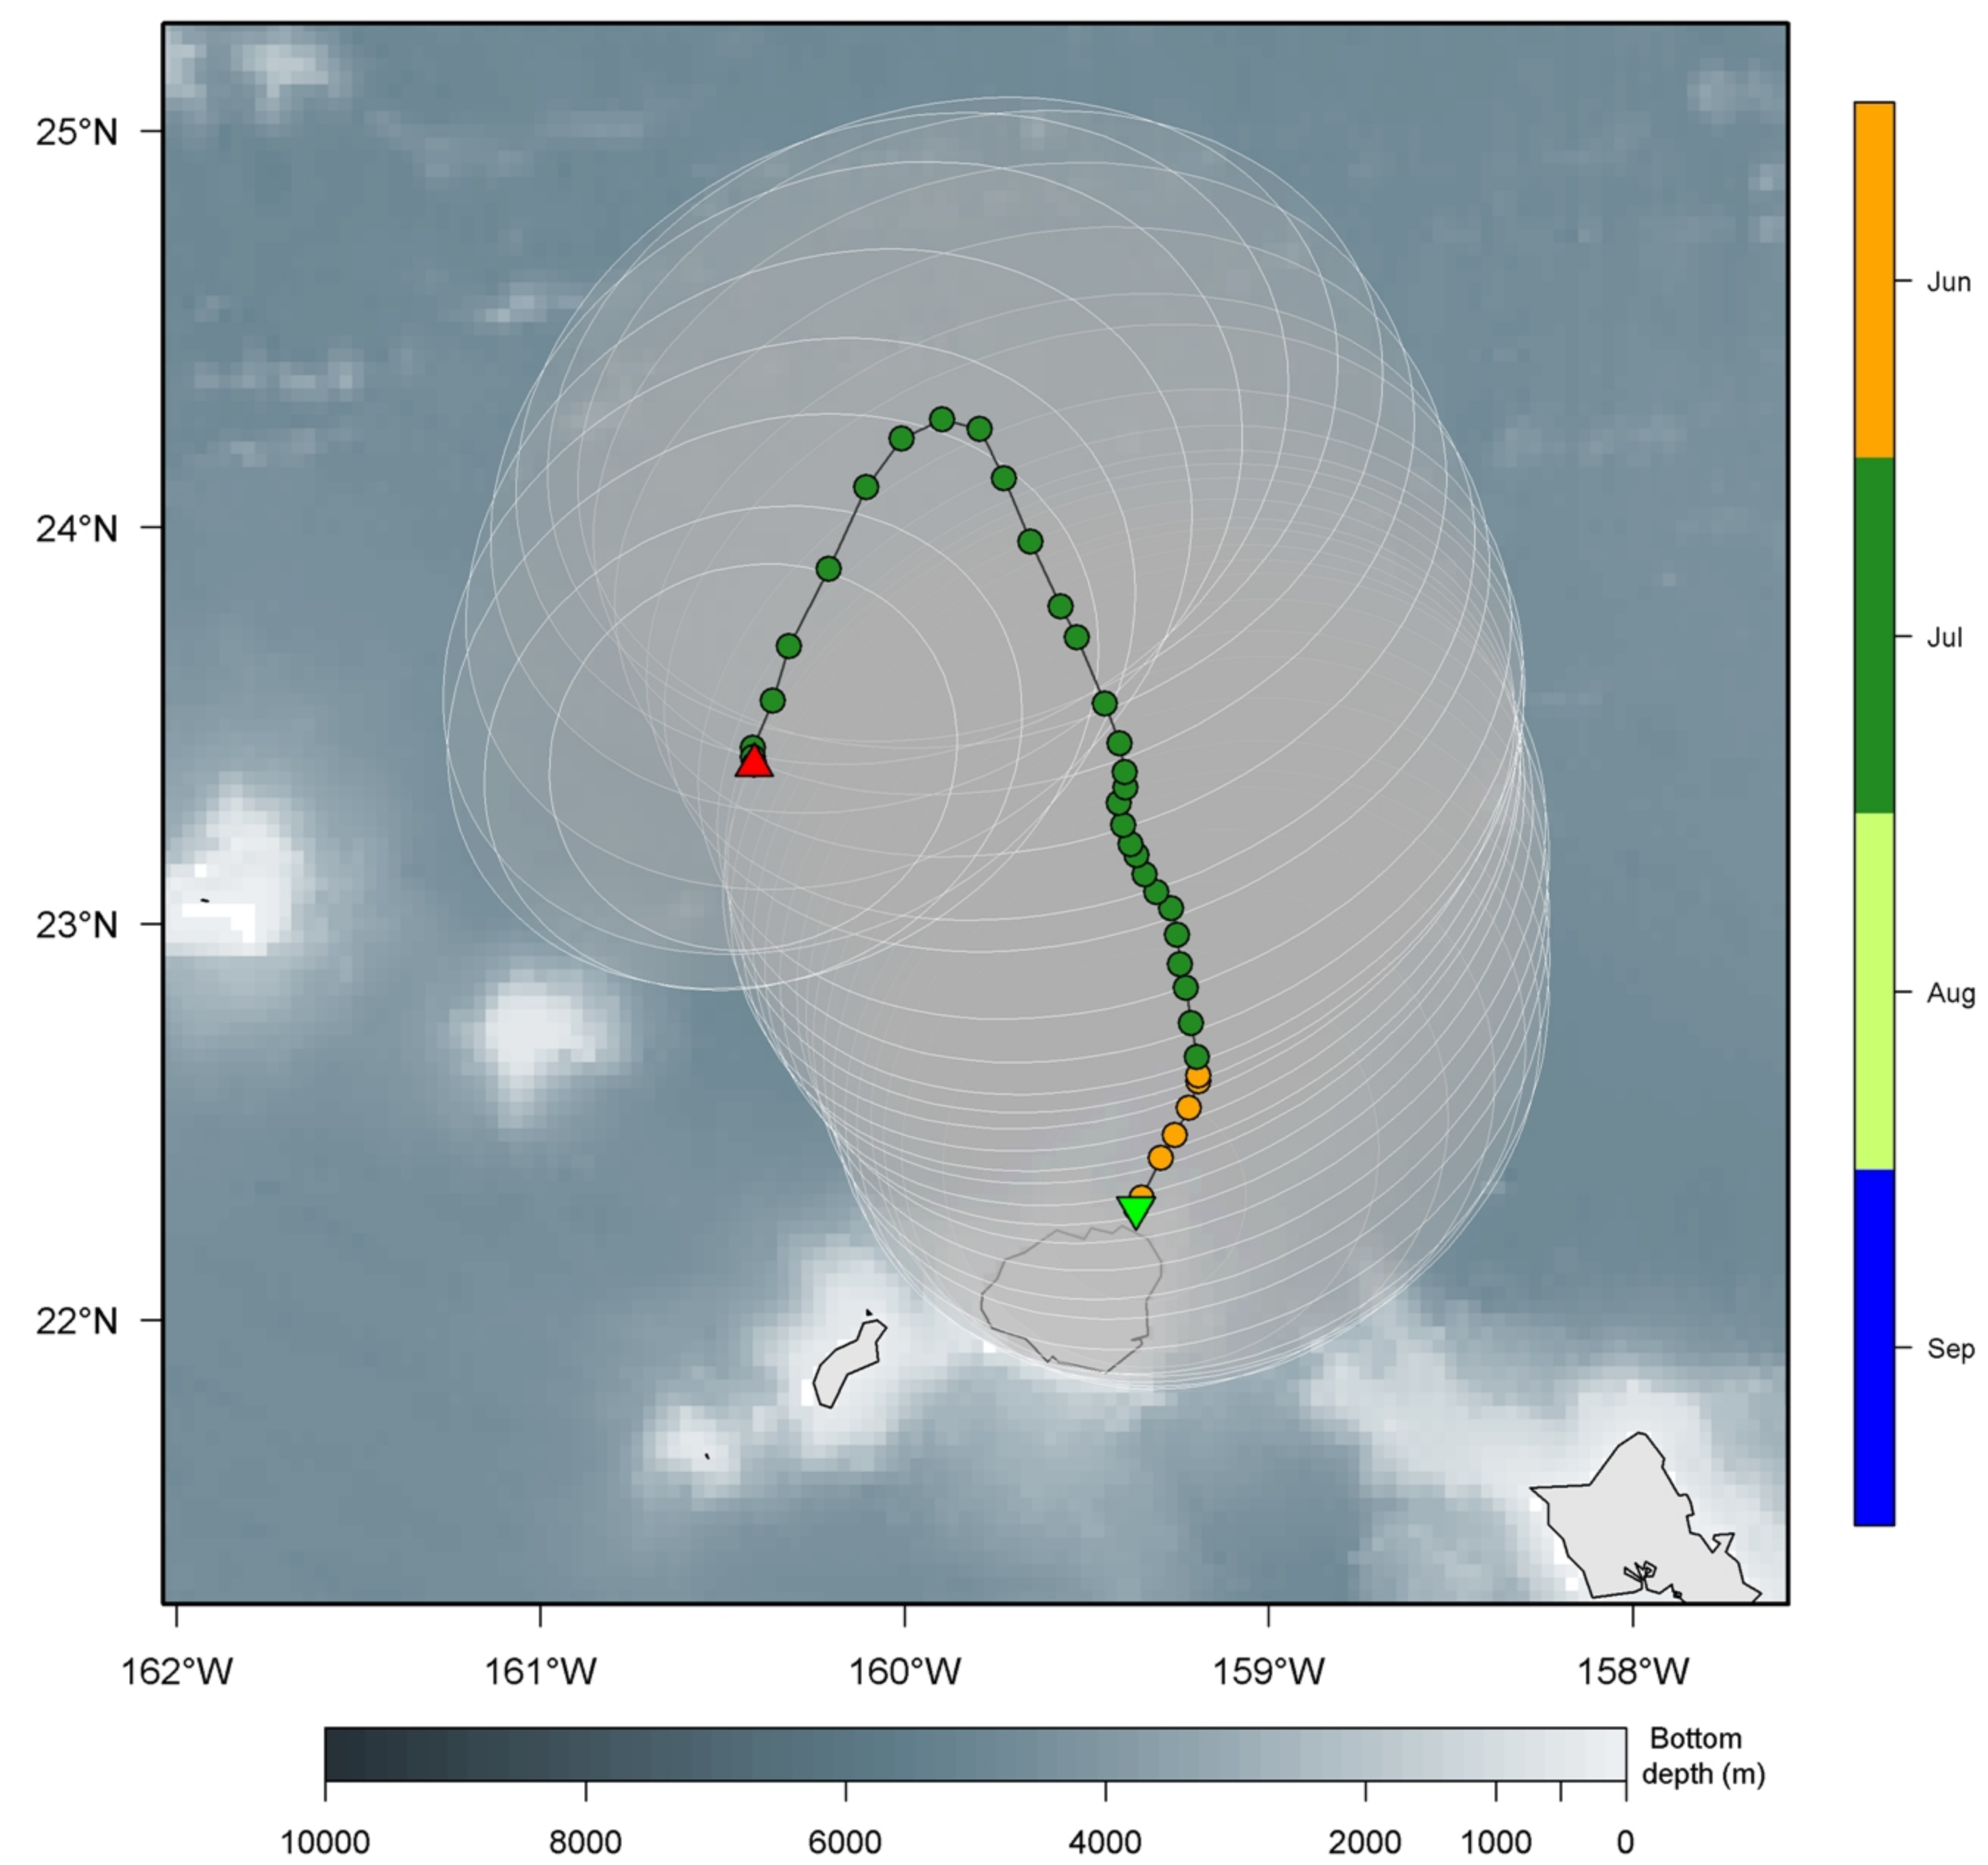

YFT.Tag07.15P1042.142393-ci

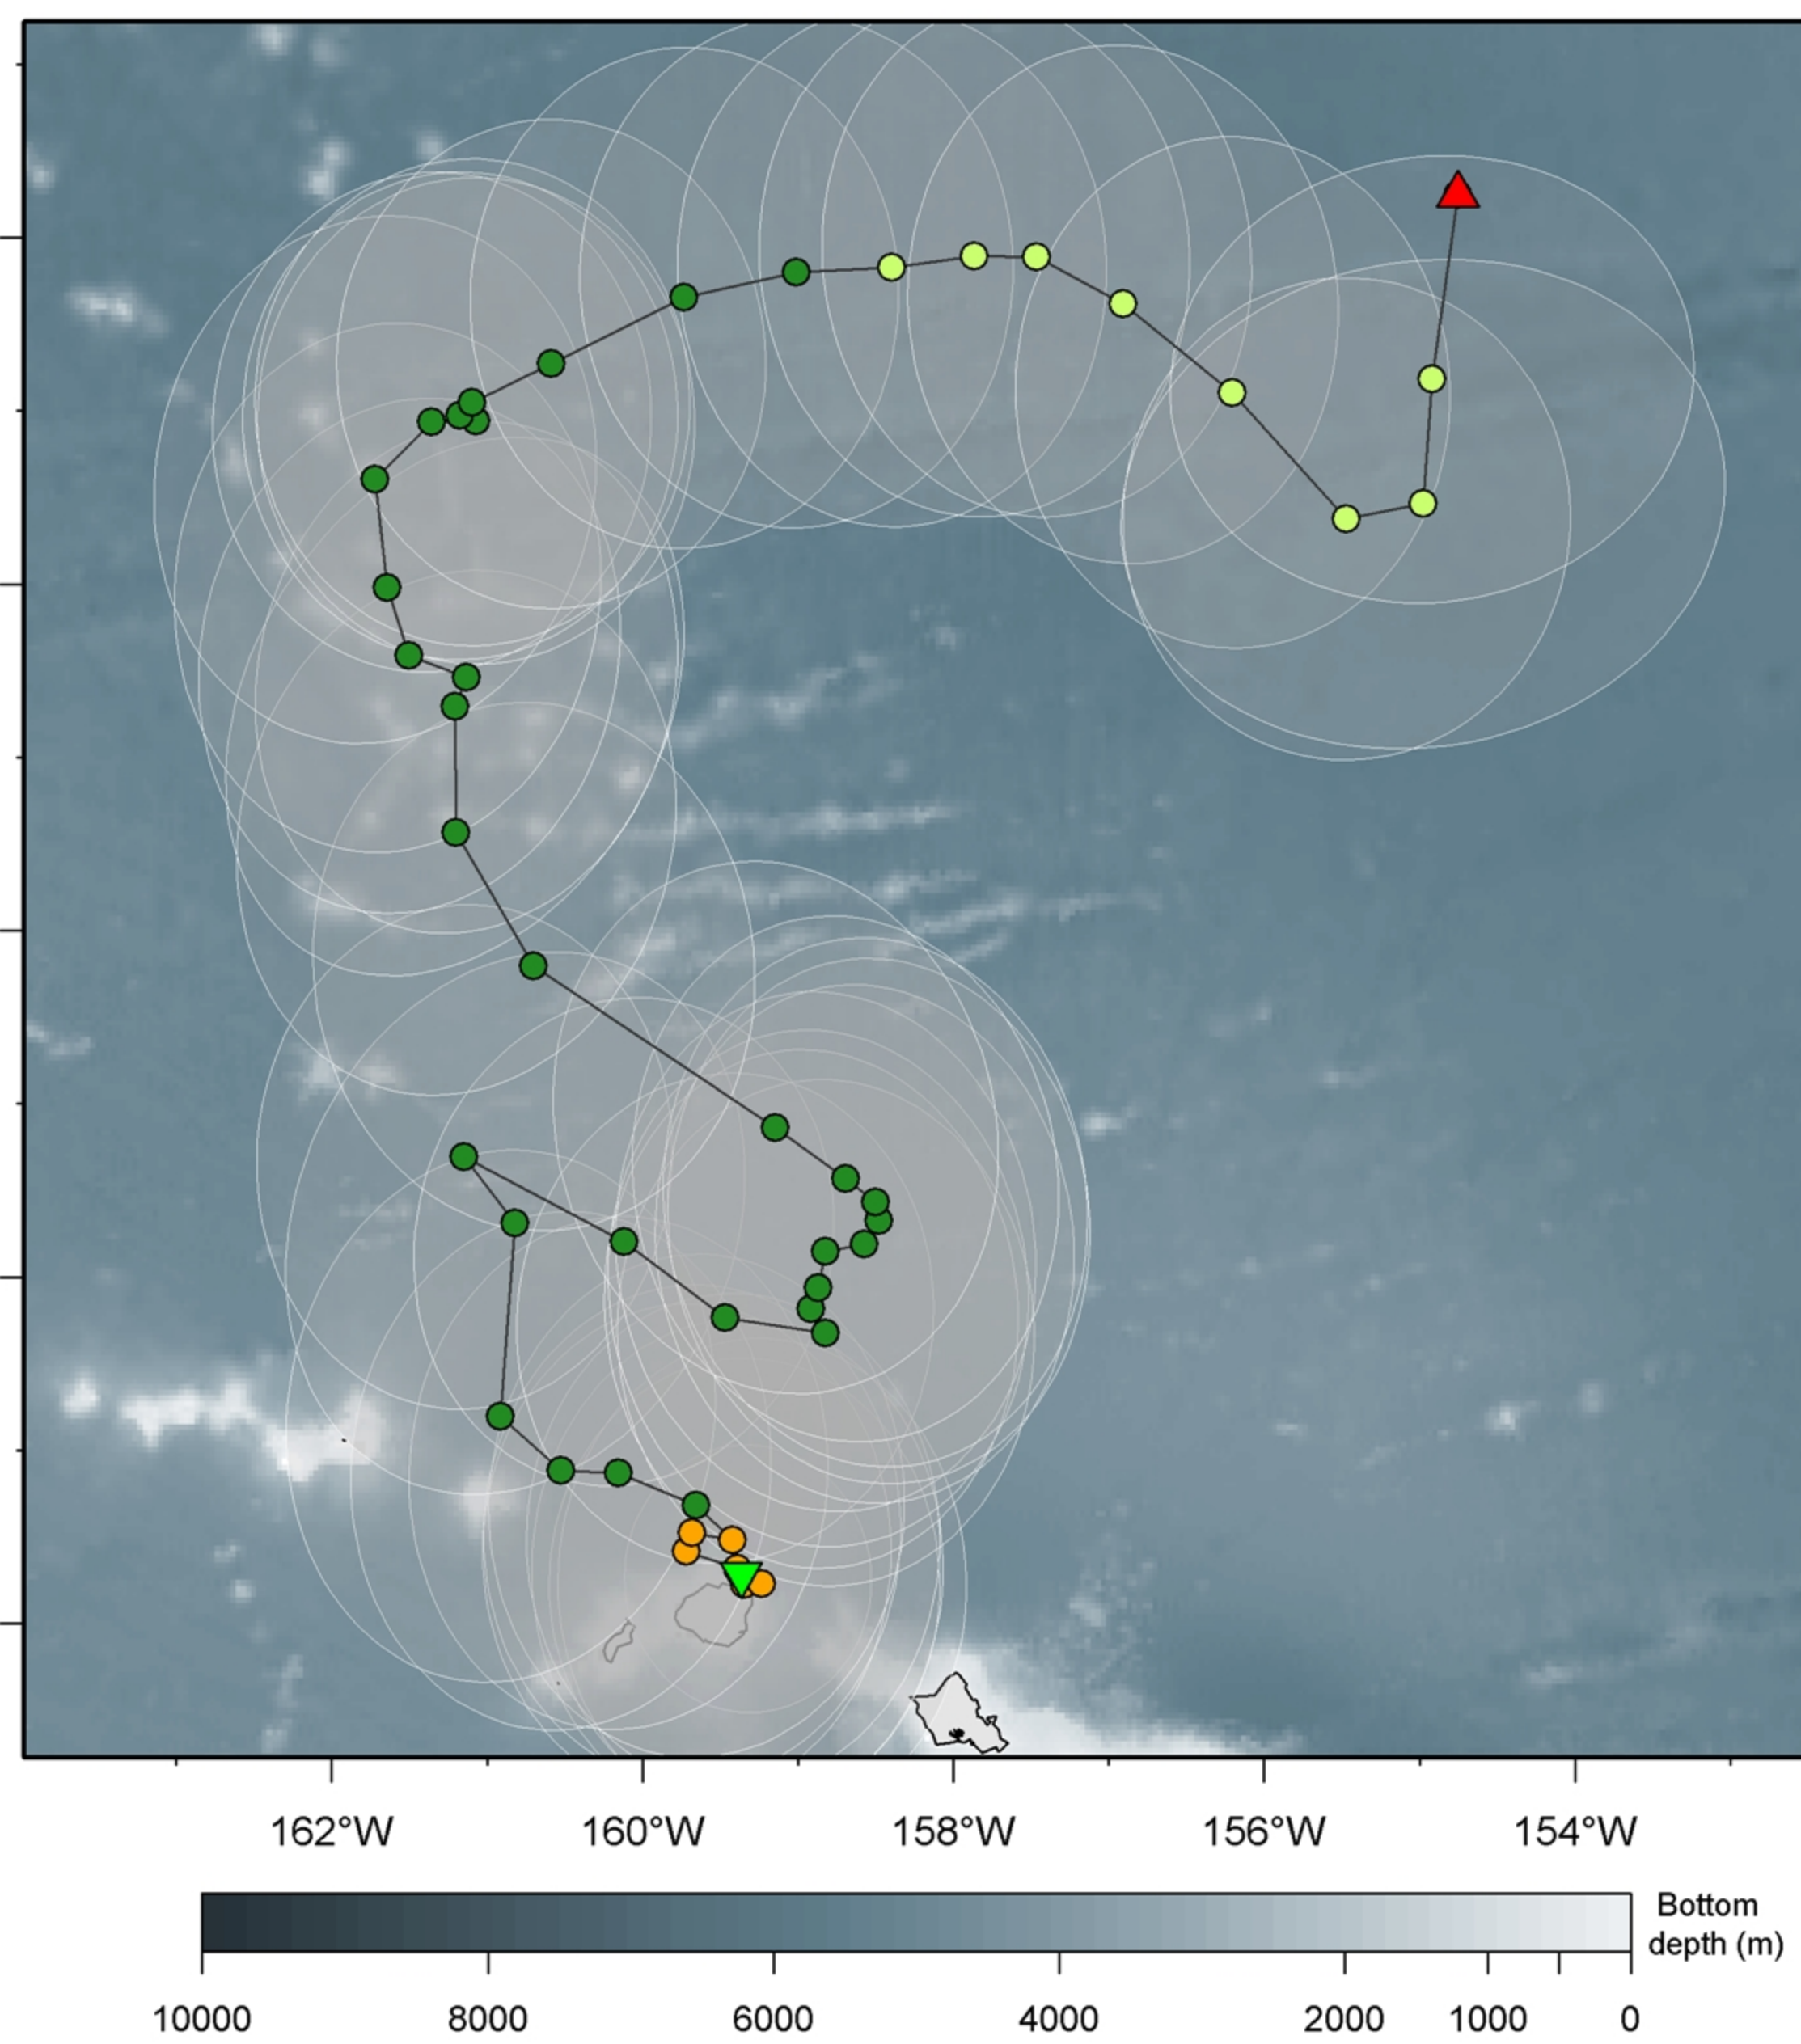

YFT.Tag08.15P1039.142387-ci

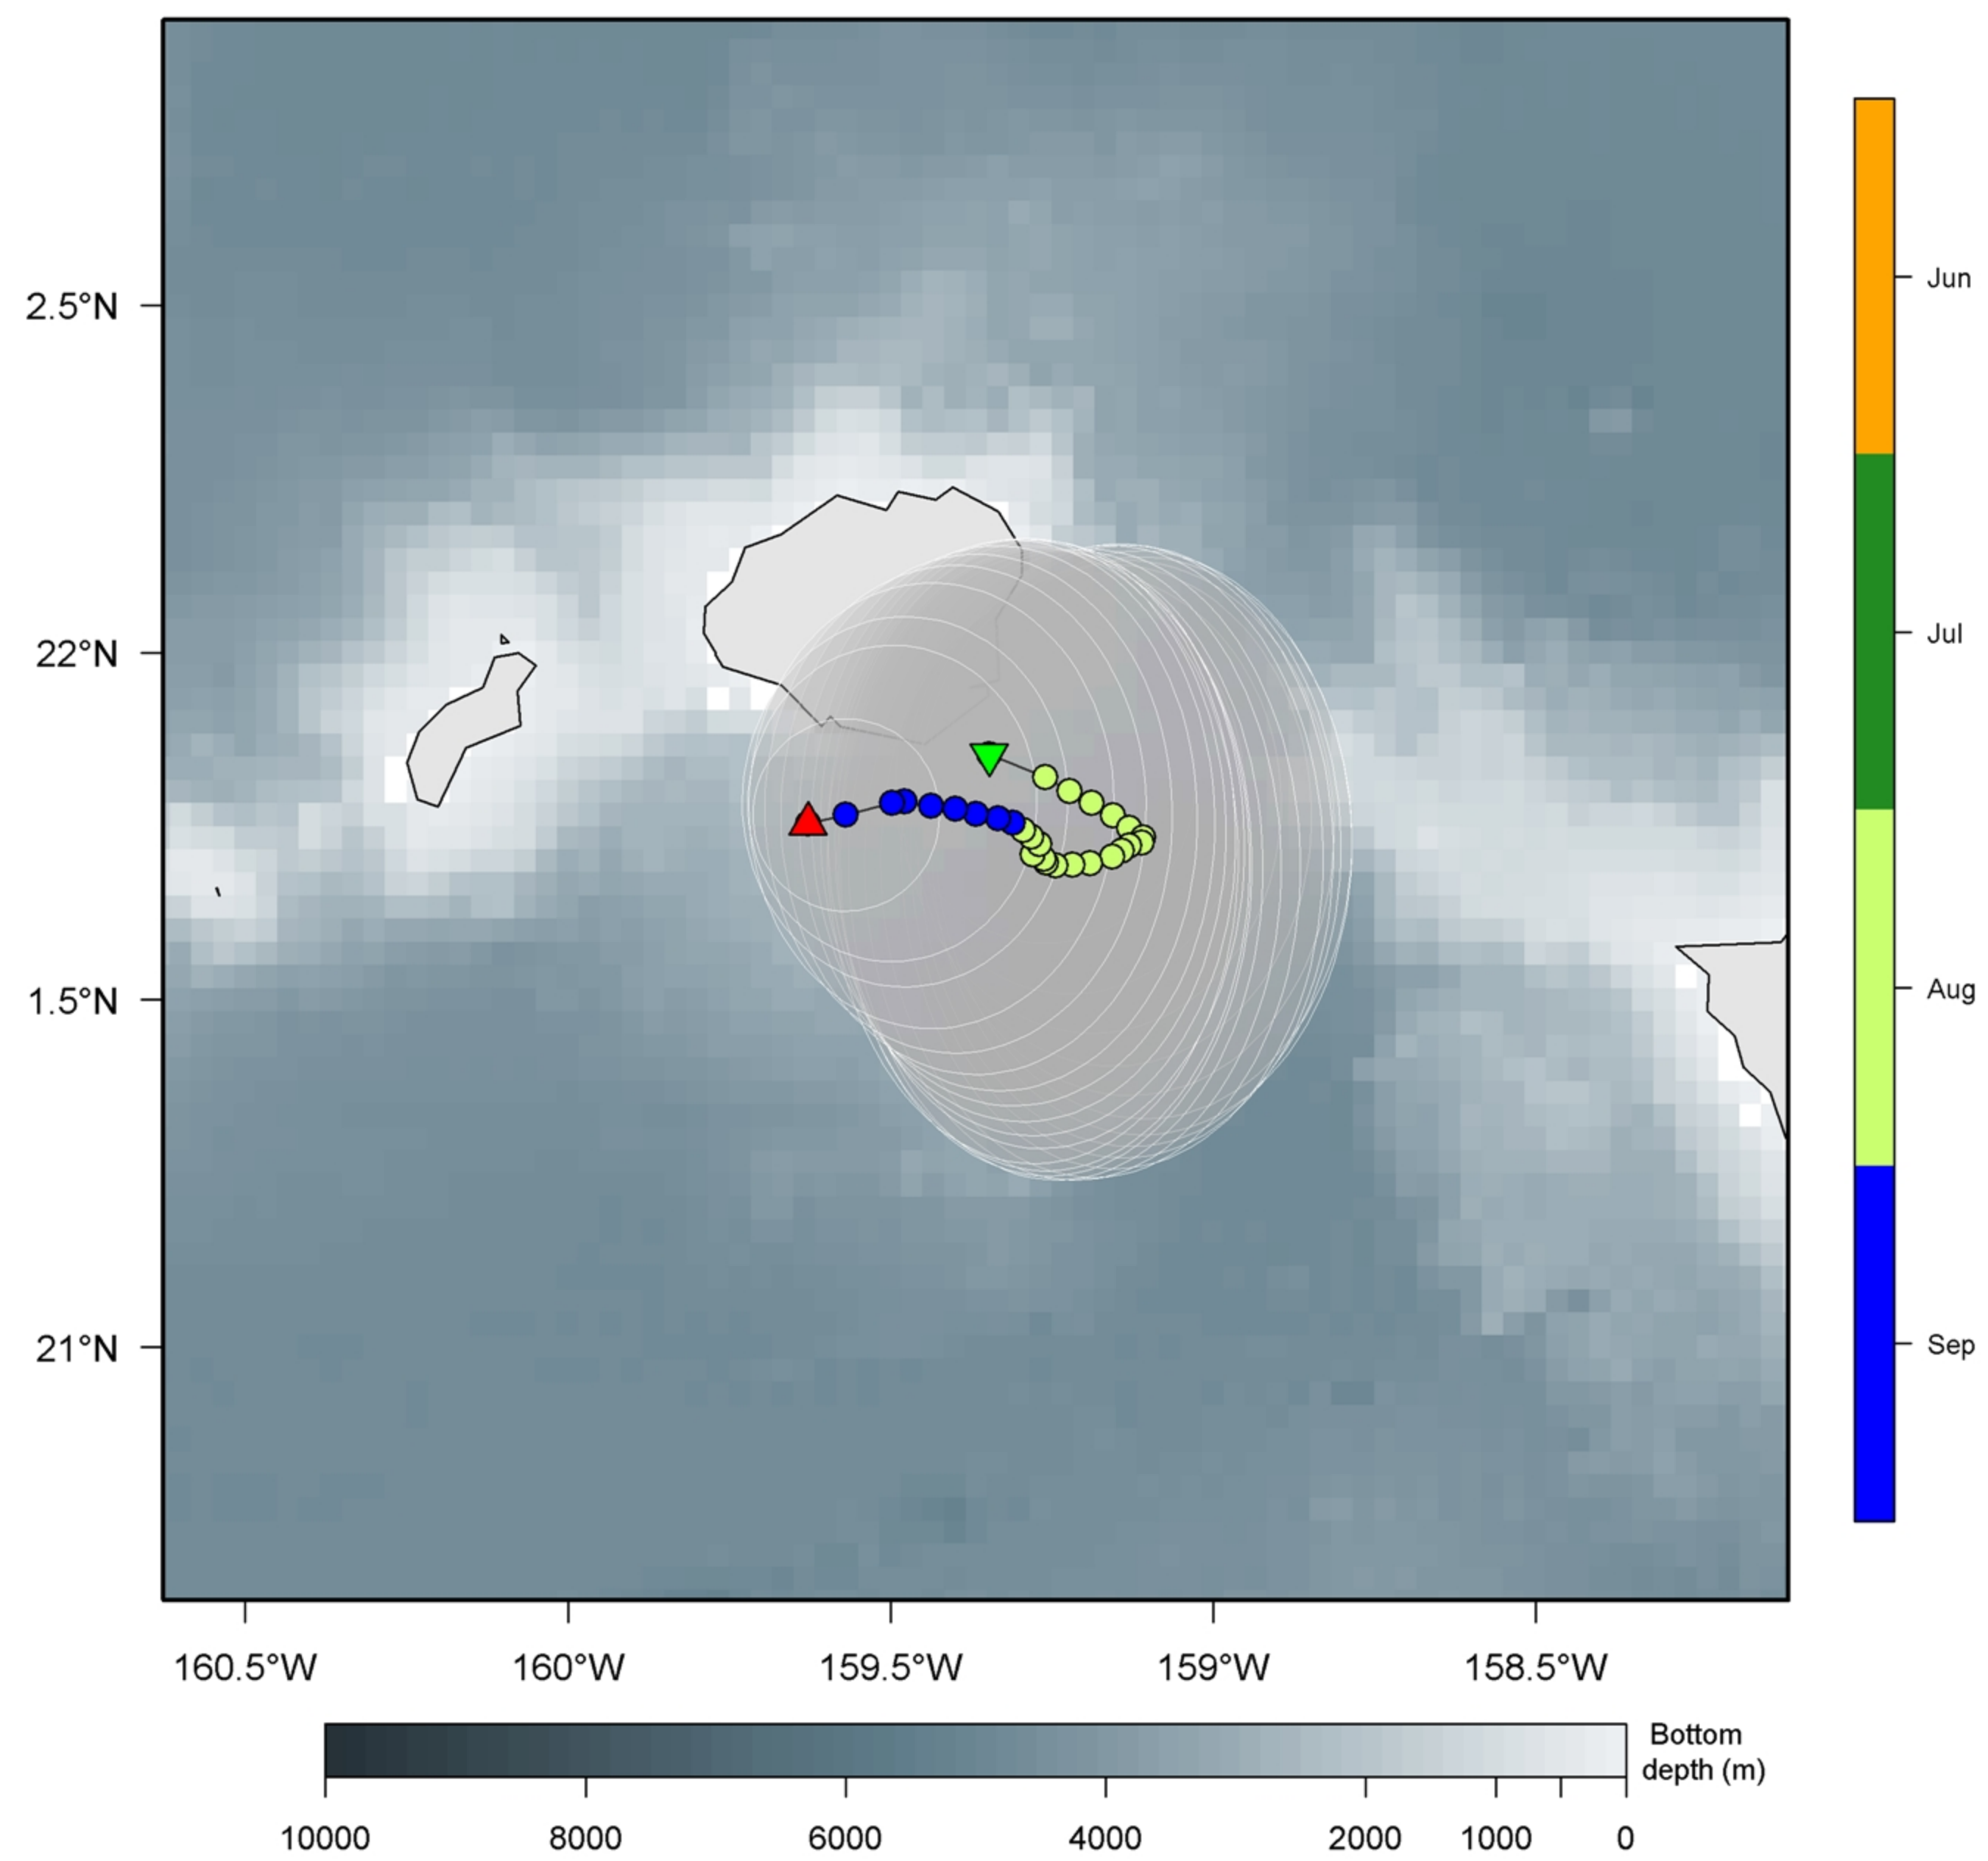

YFT.Tag09.15P1040.142389-ci



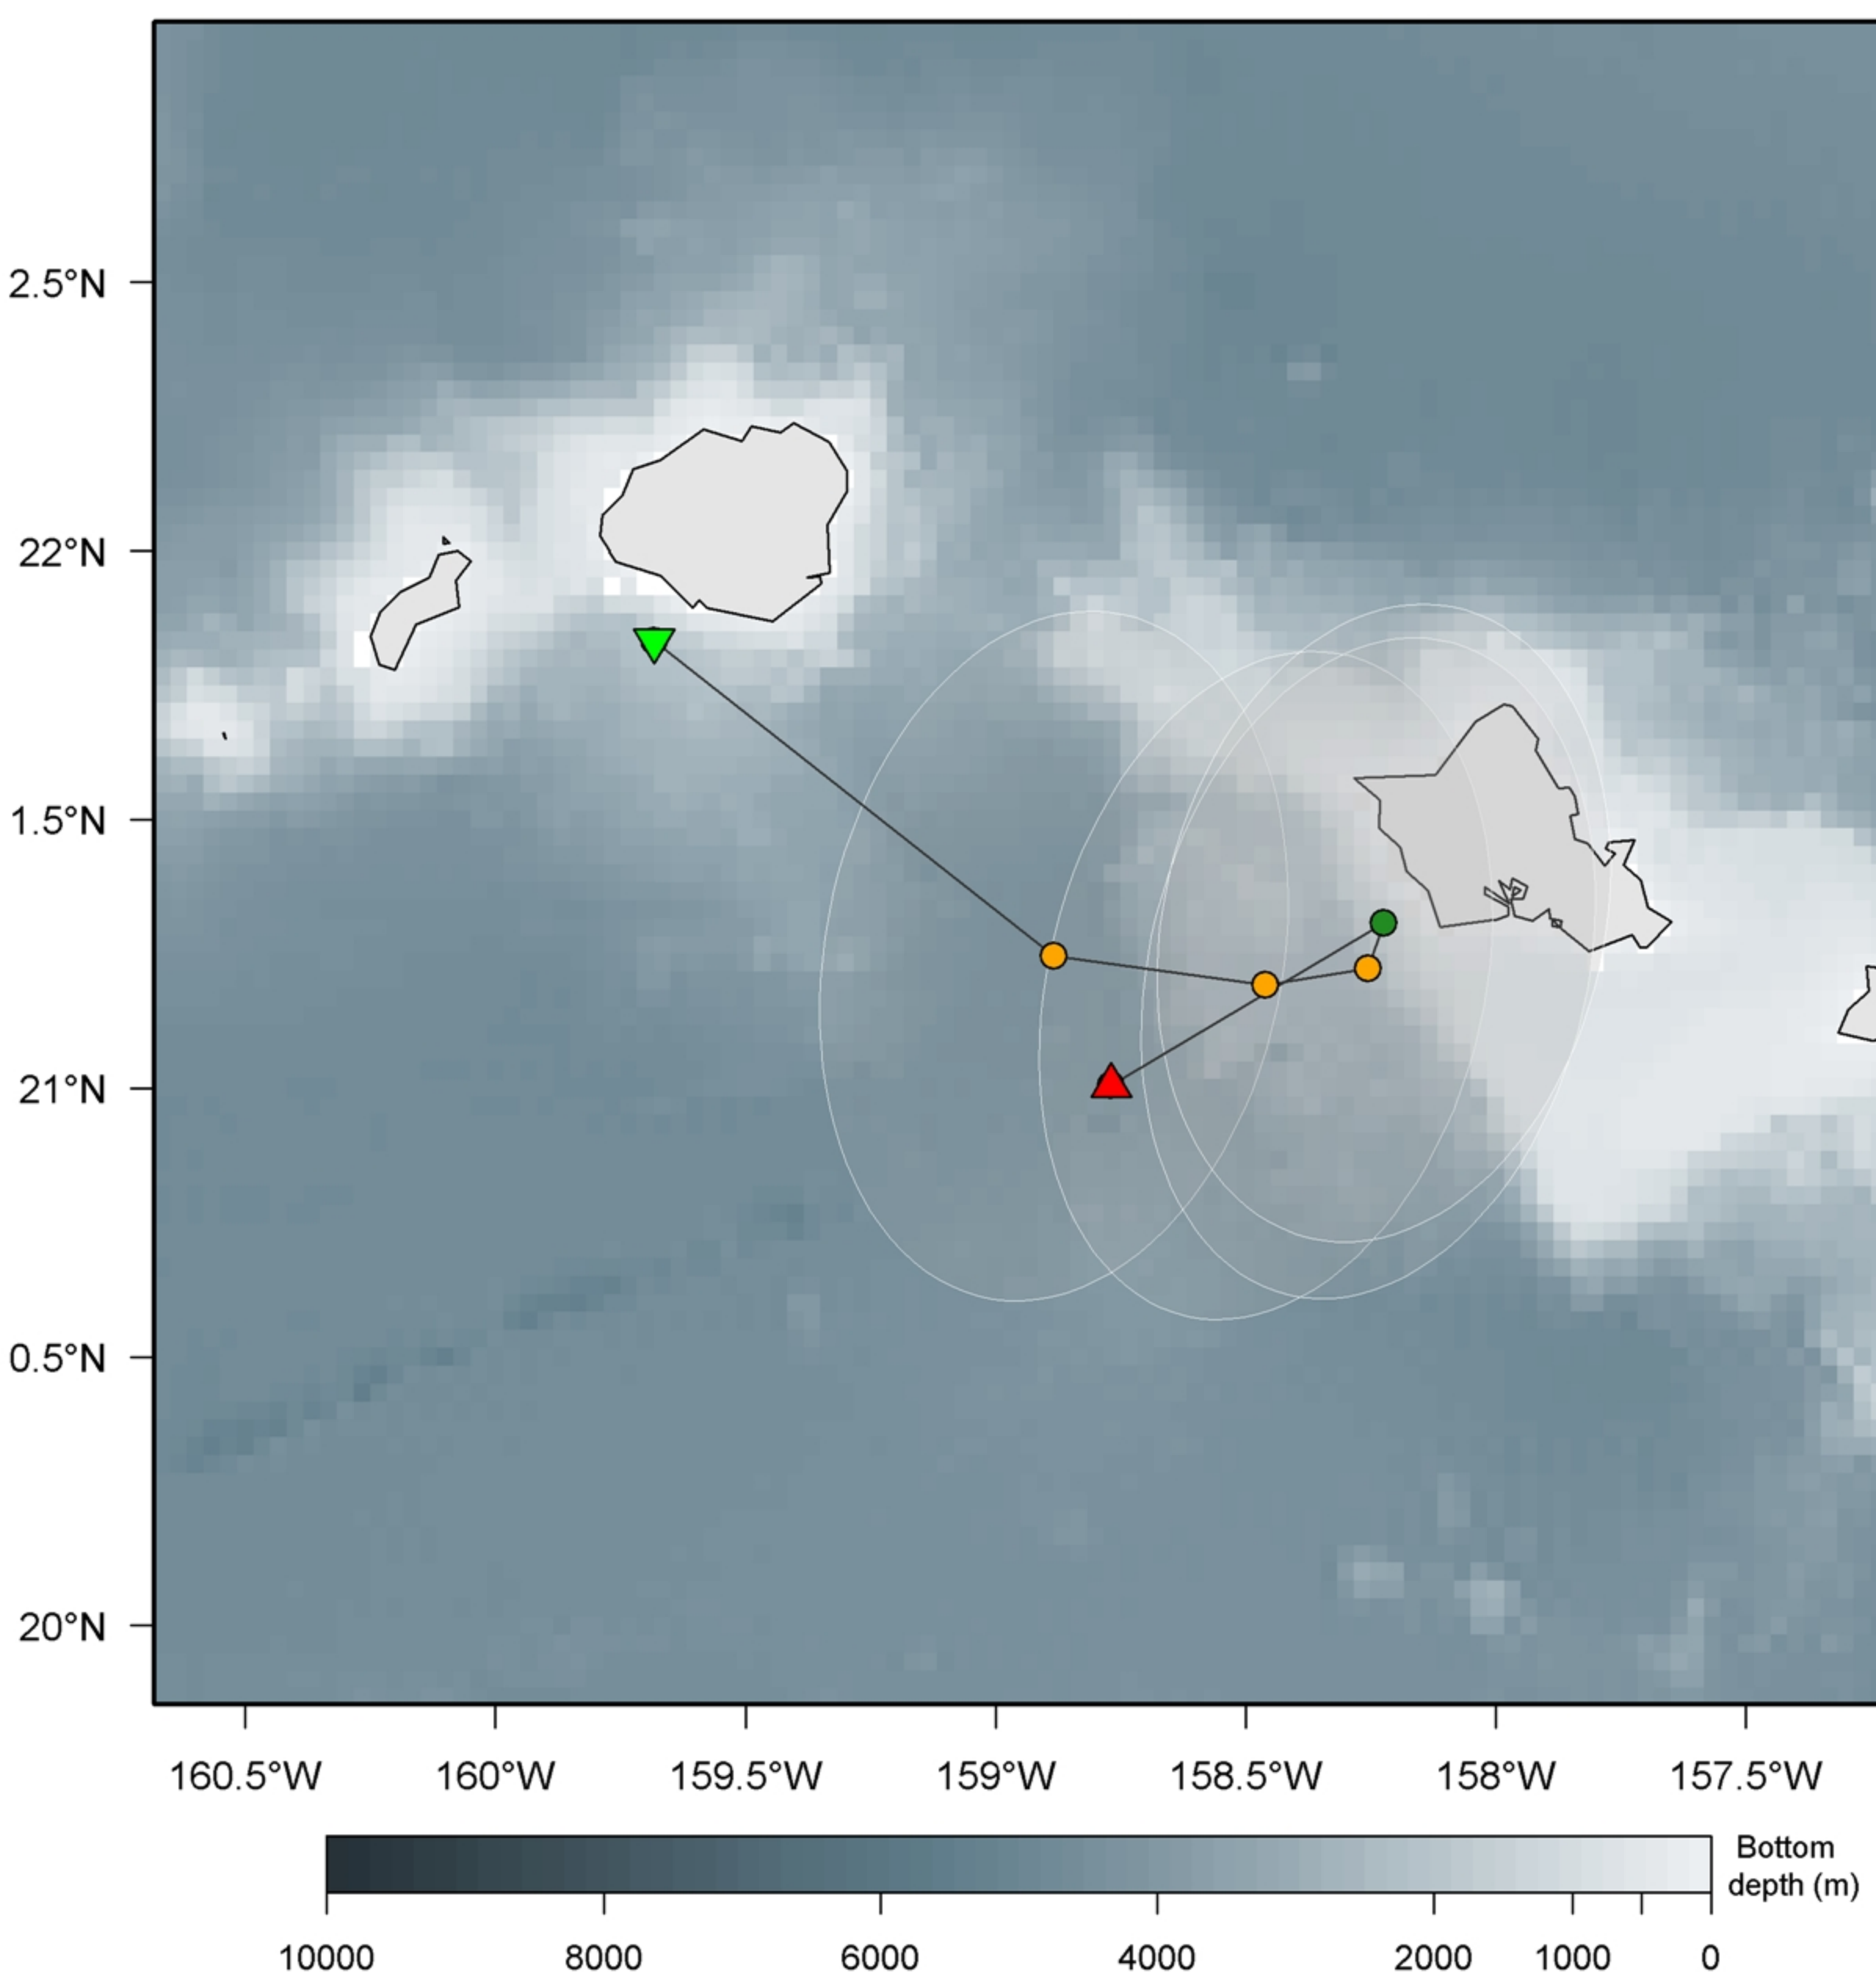

YFT.Tag10.16P1577.167344-ci

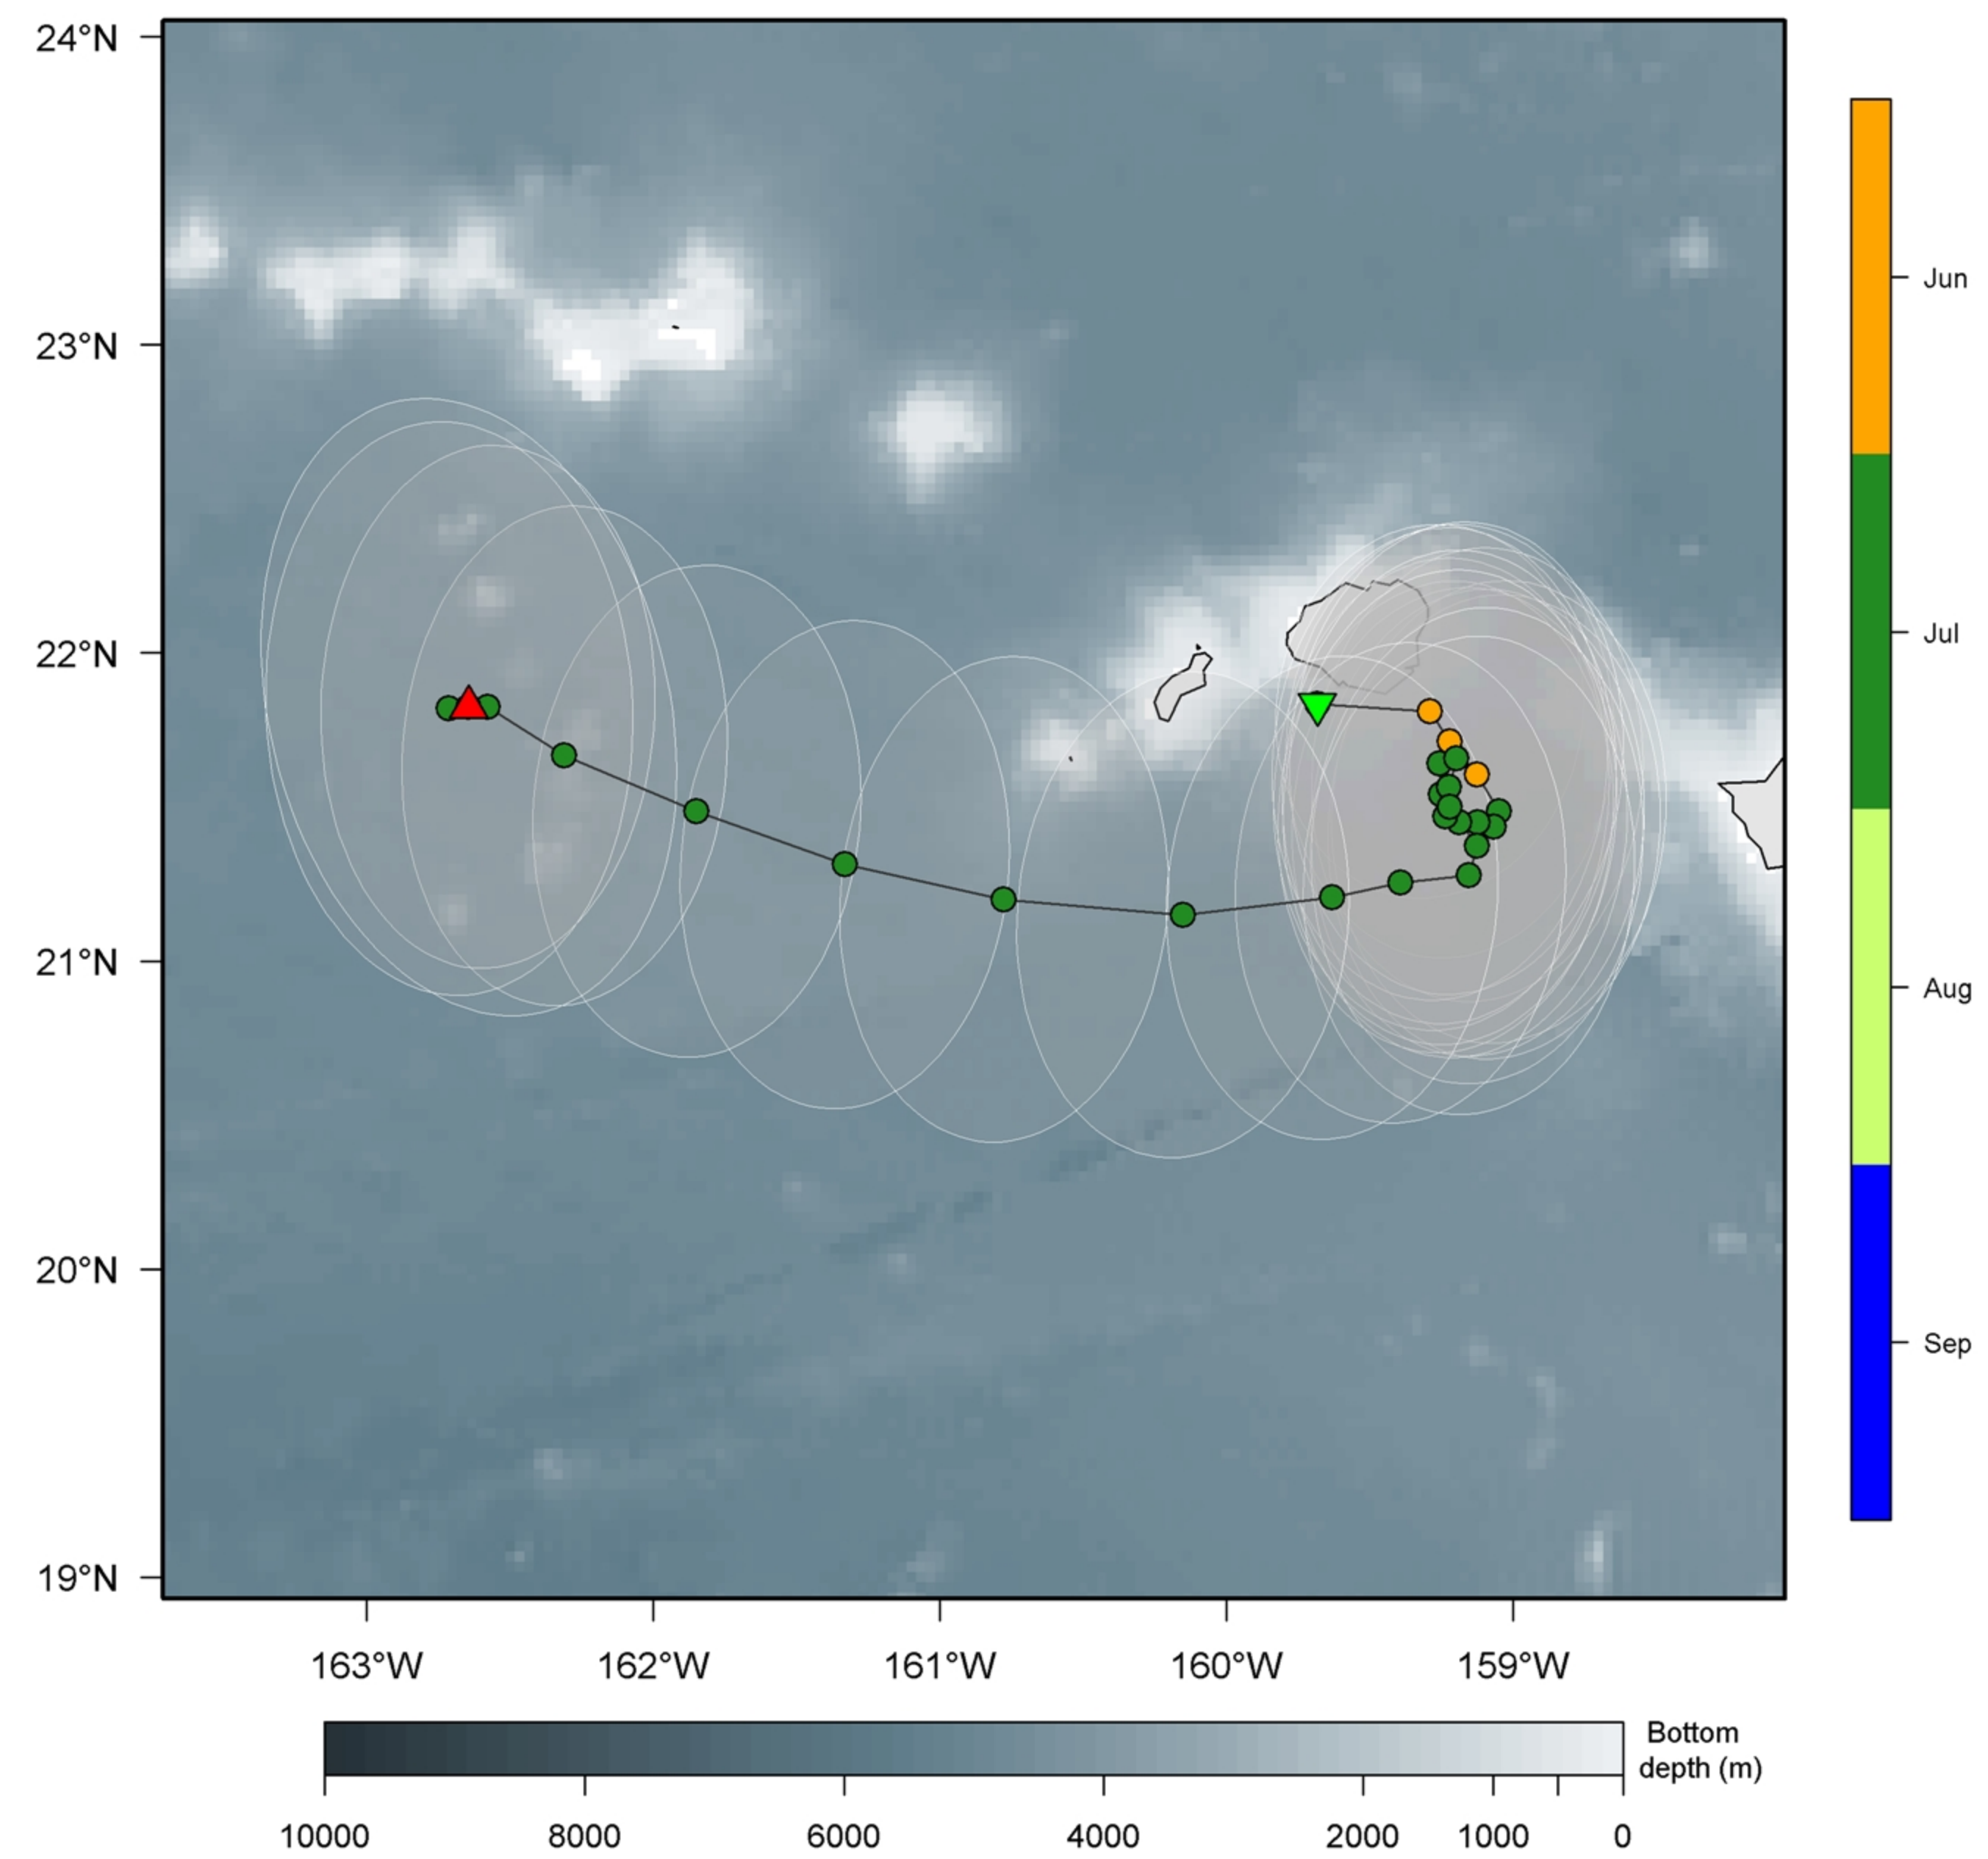

YFT.Tag12.16P1589.167352-ci

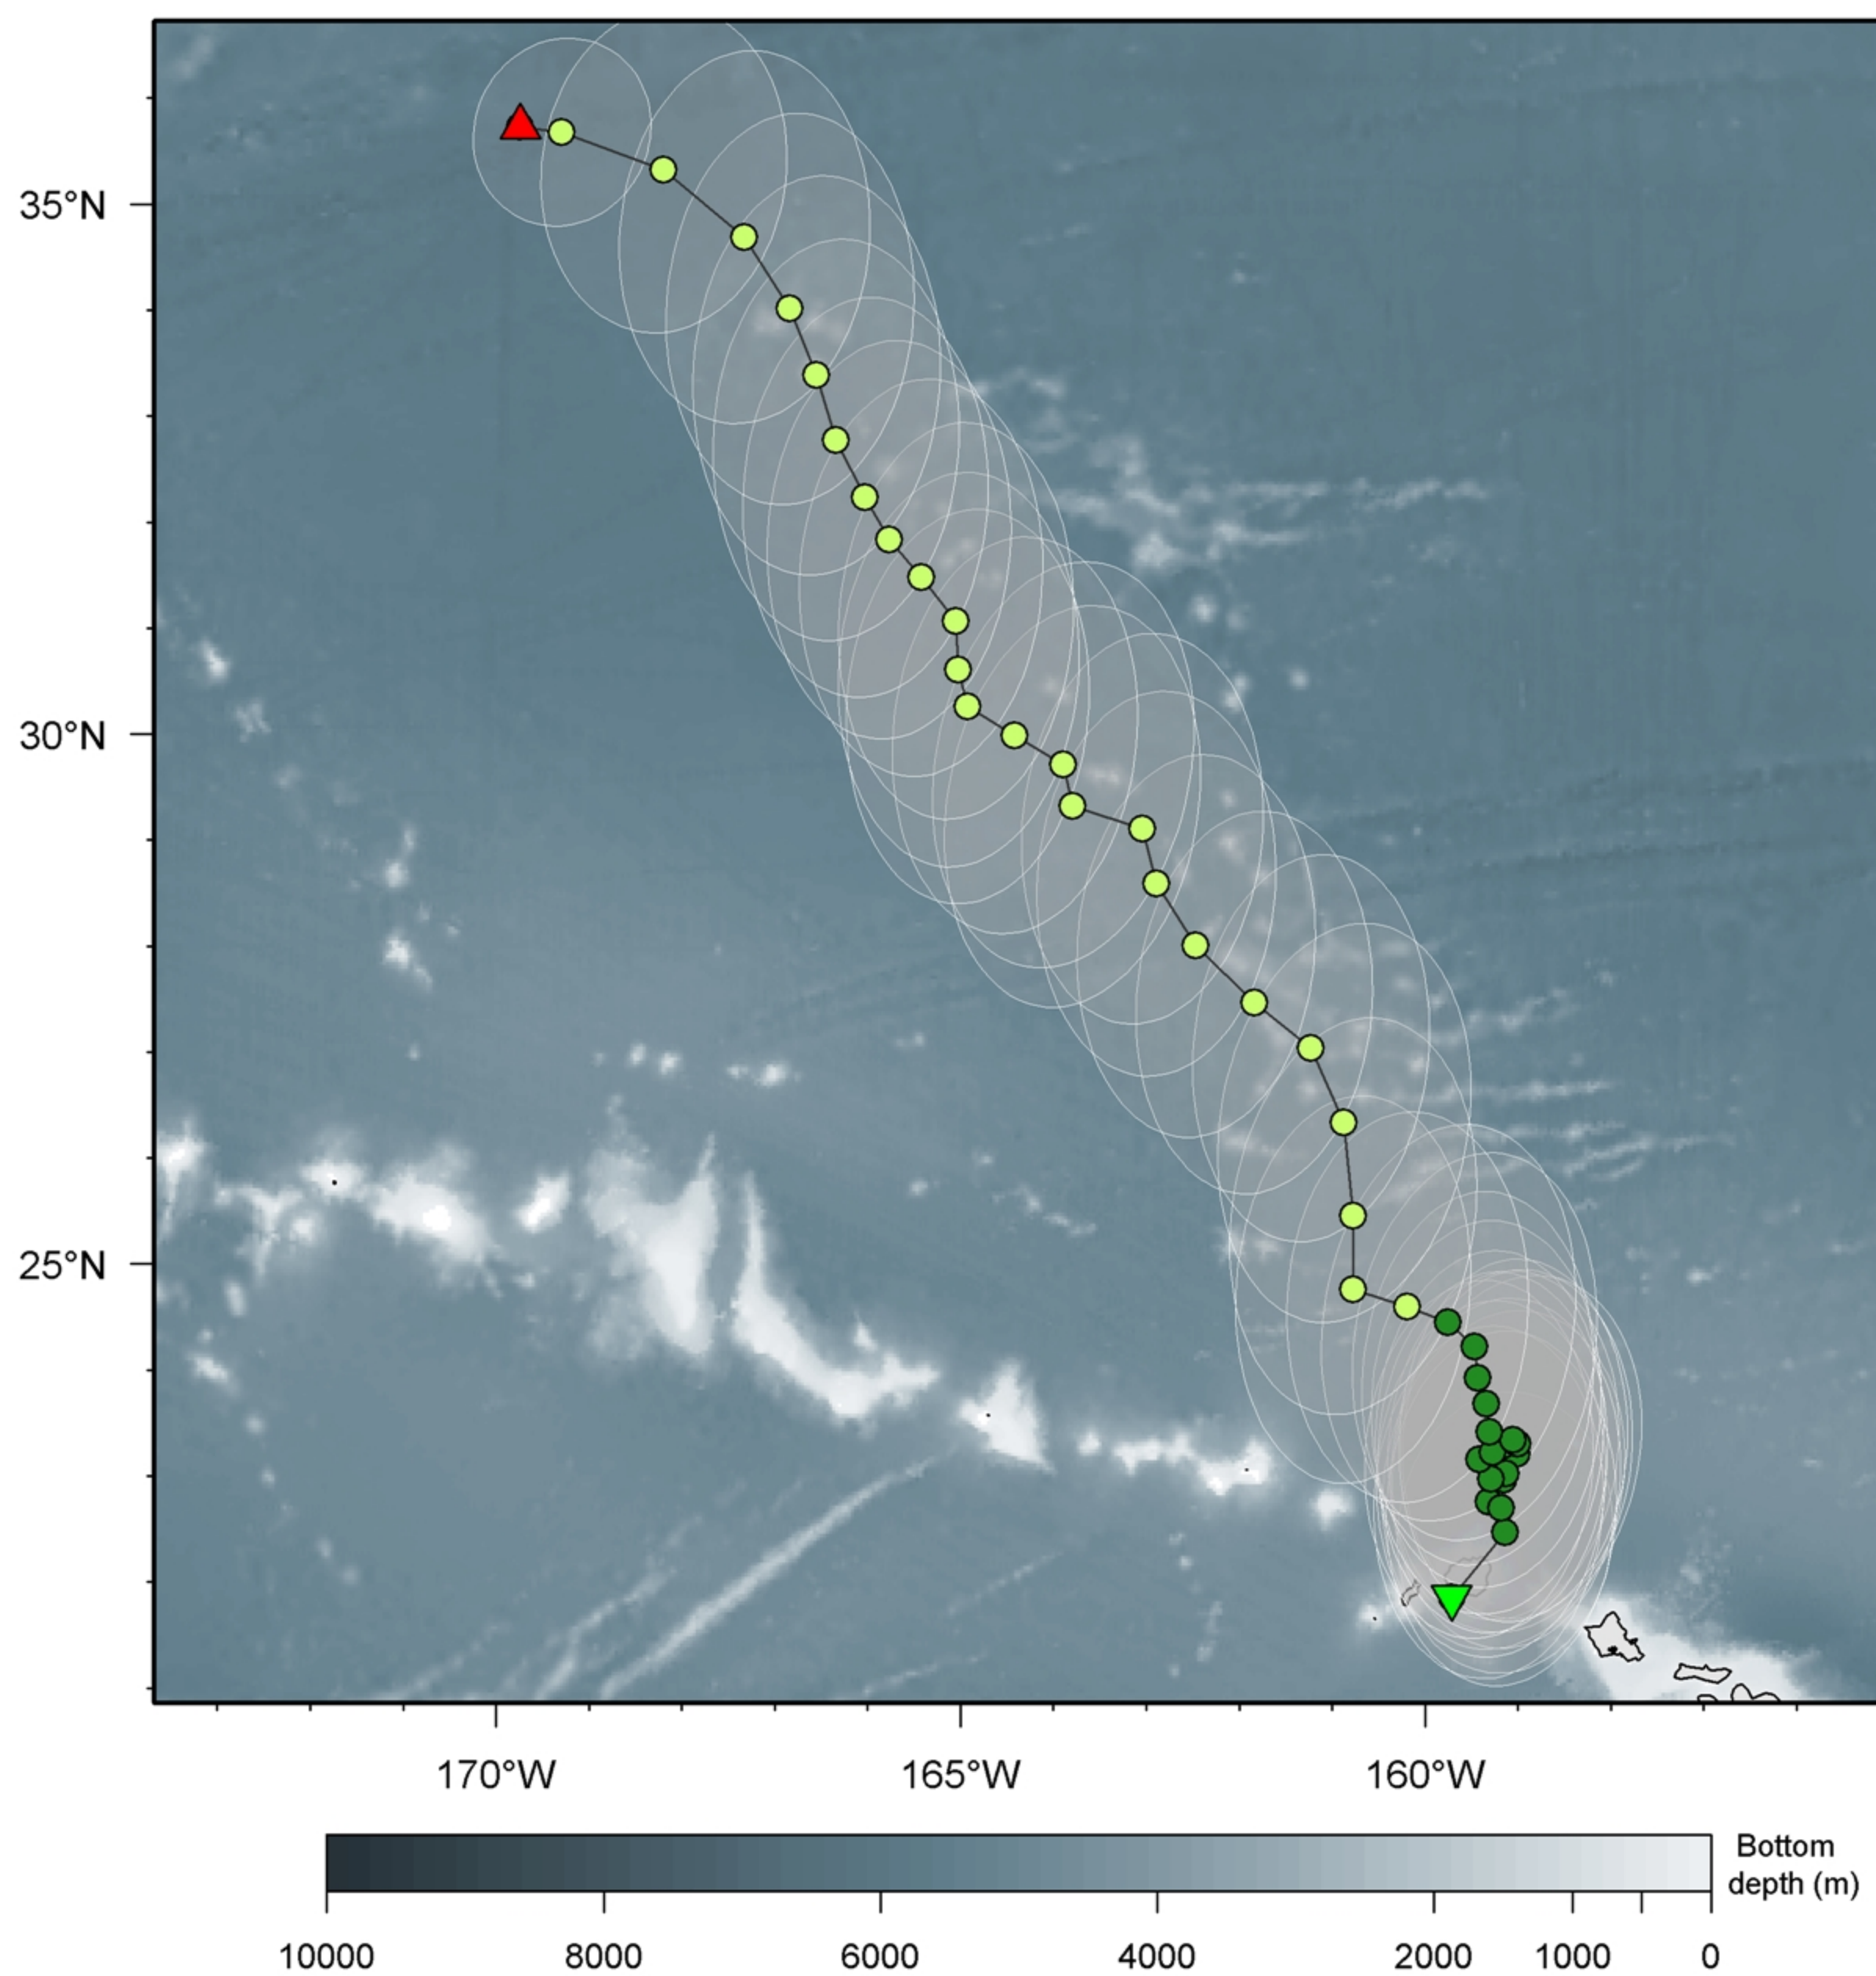

YFT.Tag13.16P1872.169359-ci

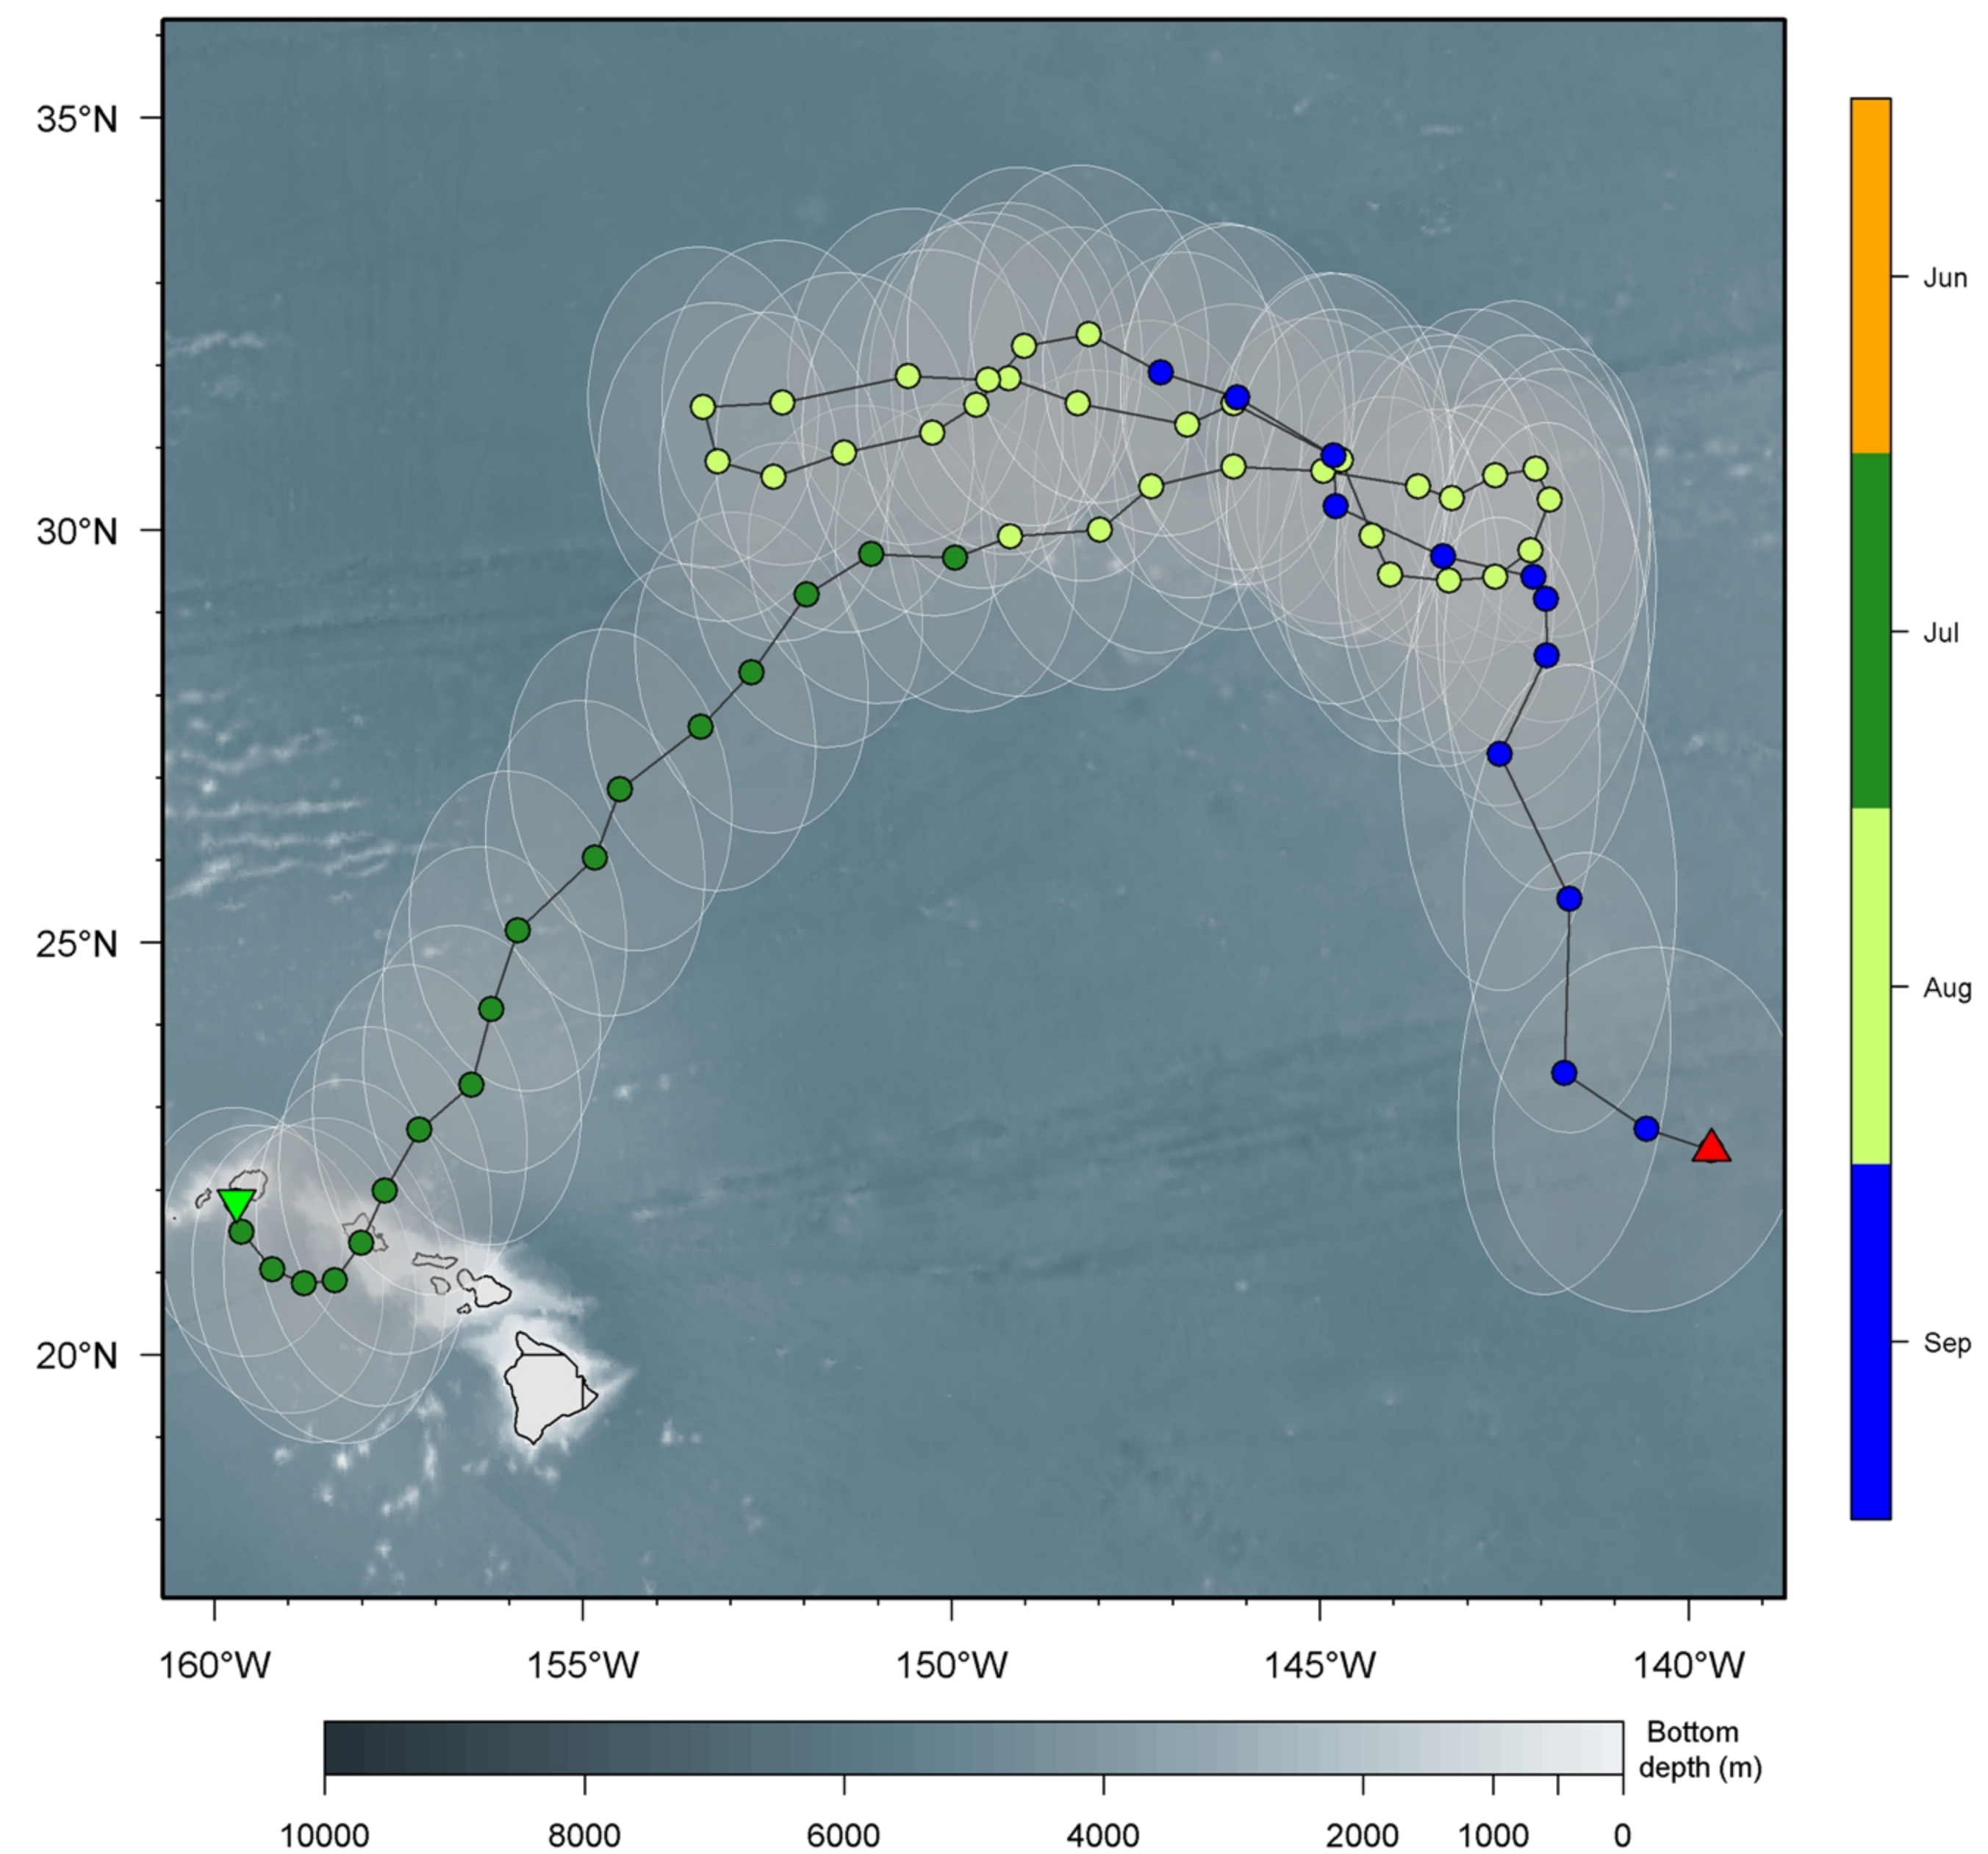

YFT.Tag14.16P1888.169360-ci



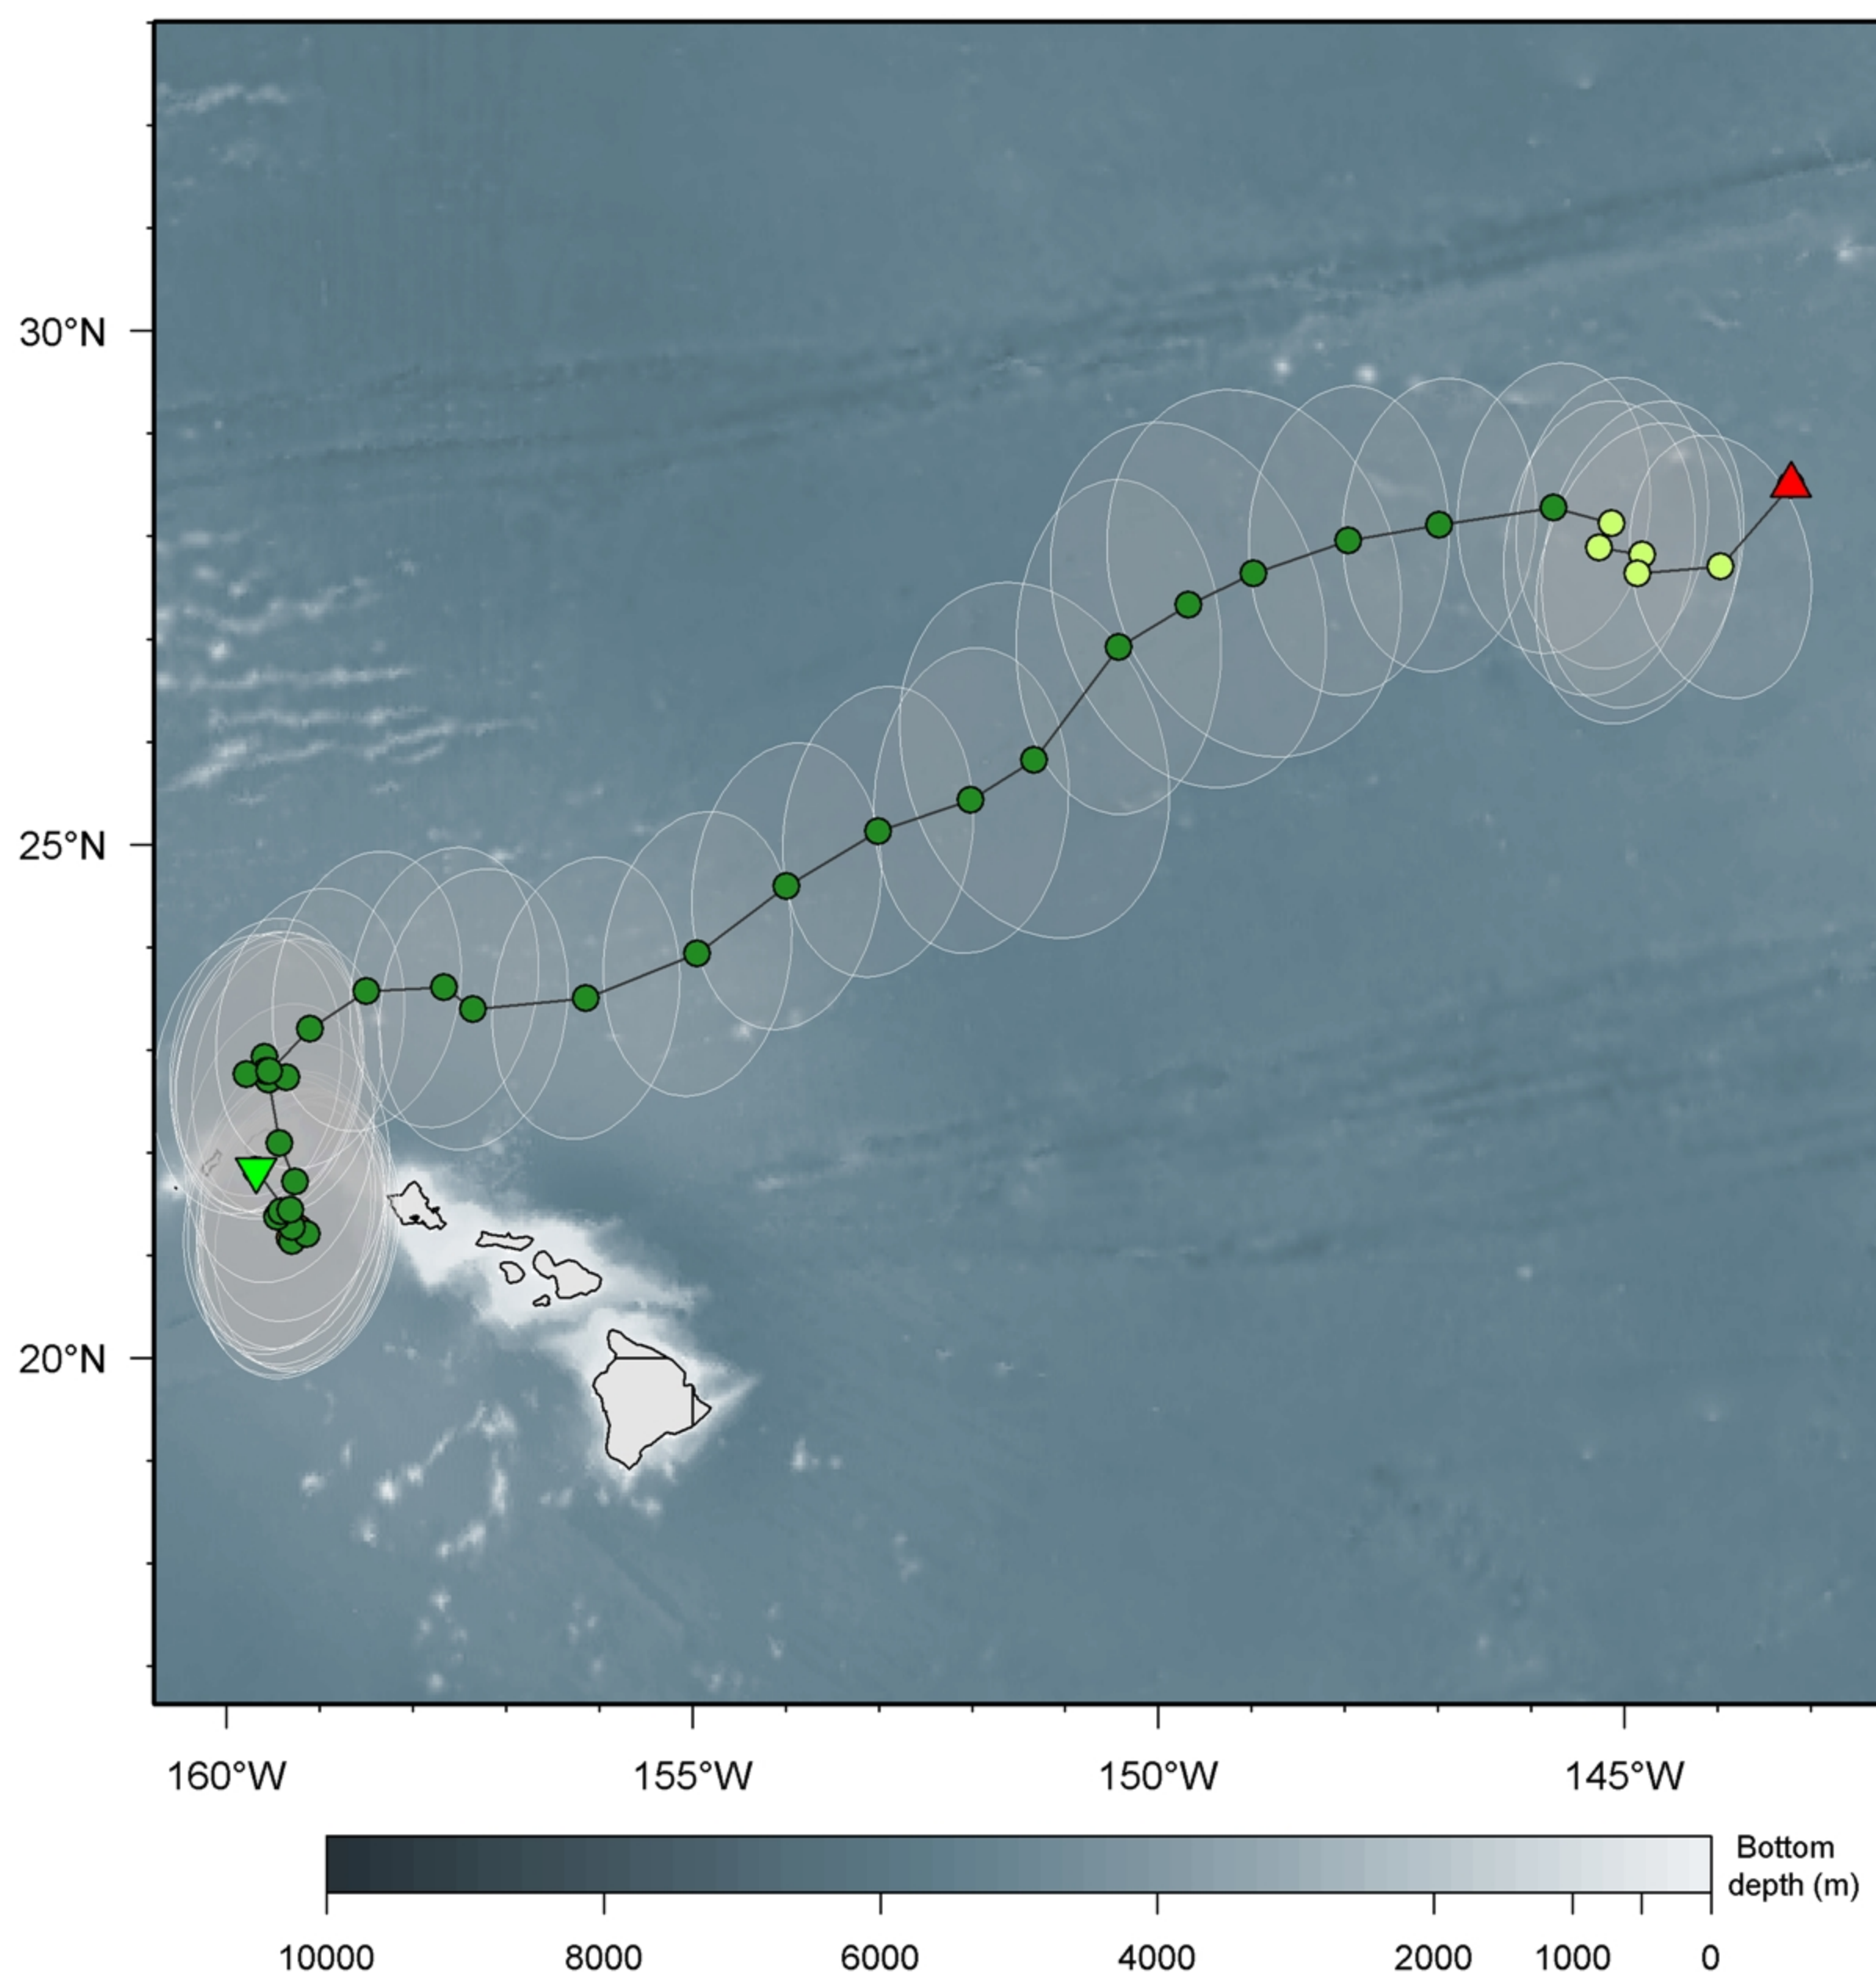

YFT.Tag15.16P1571.167339-ci

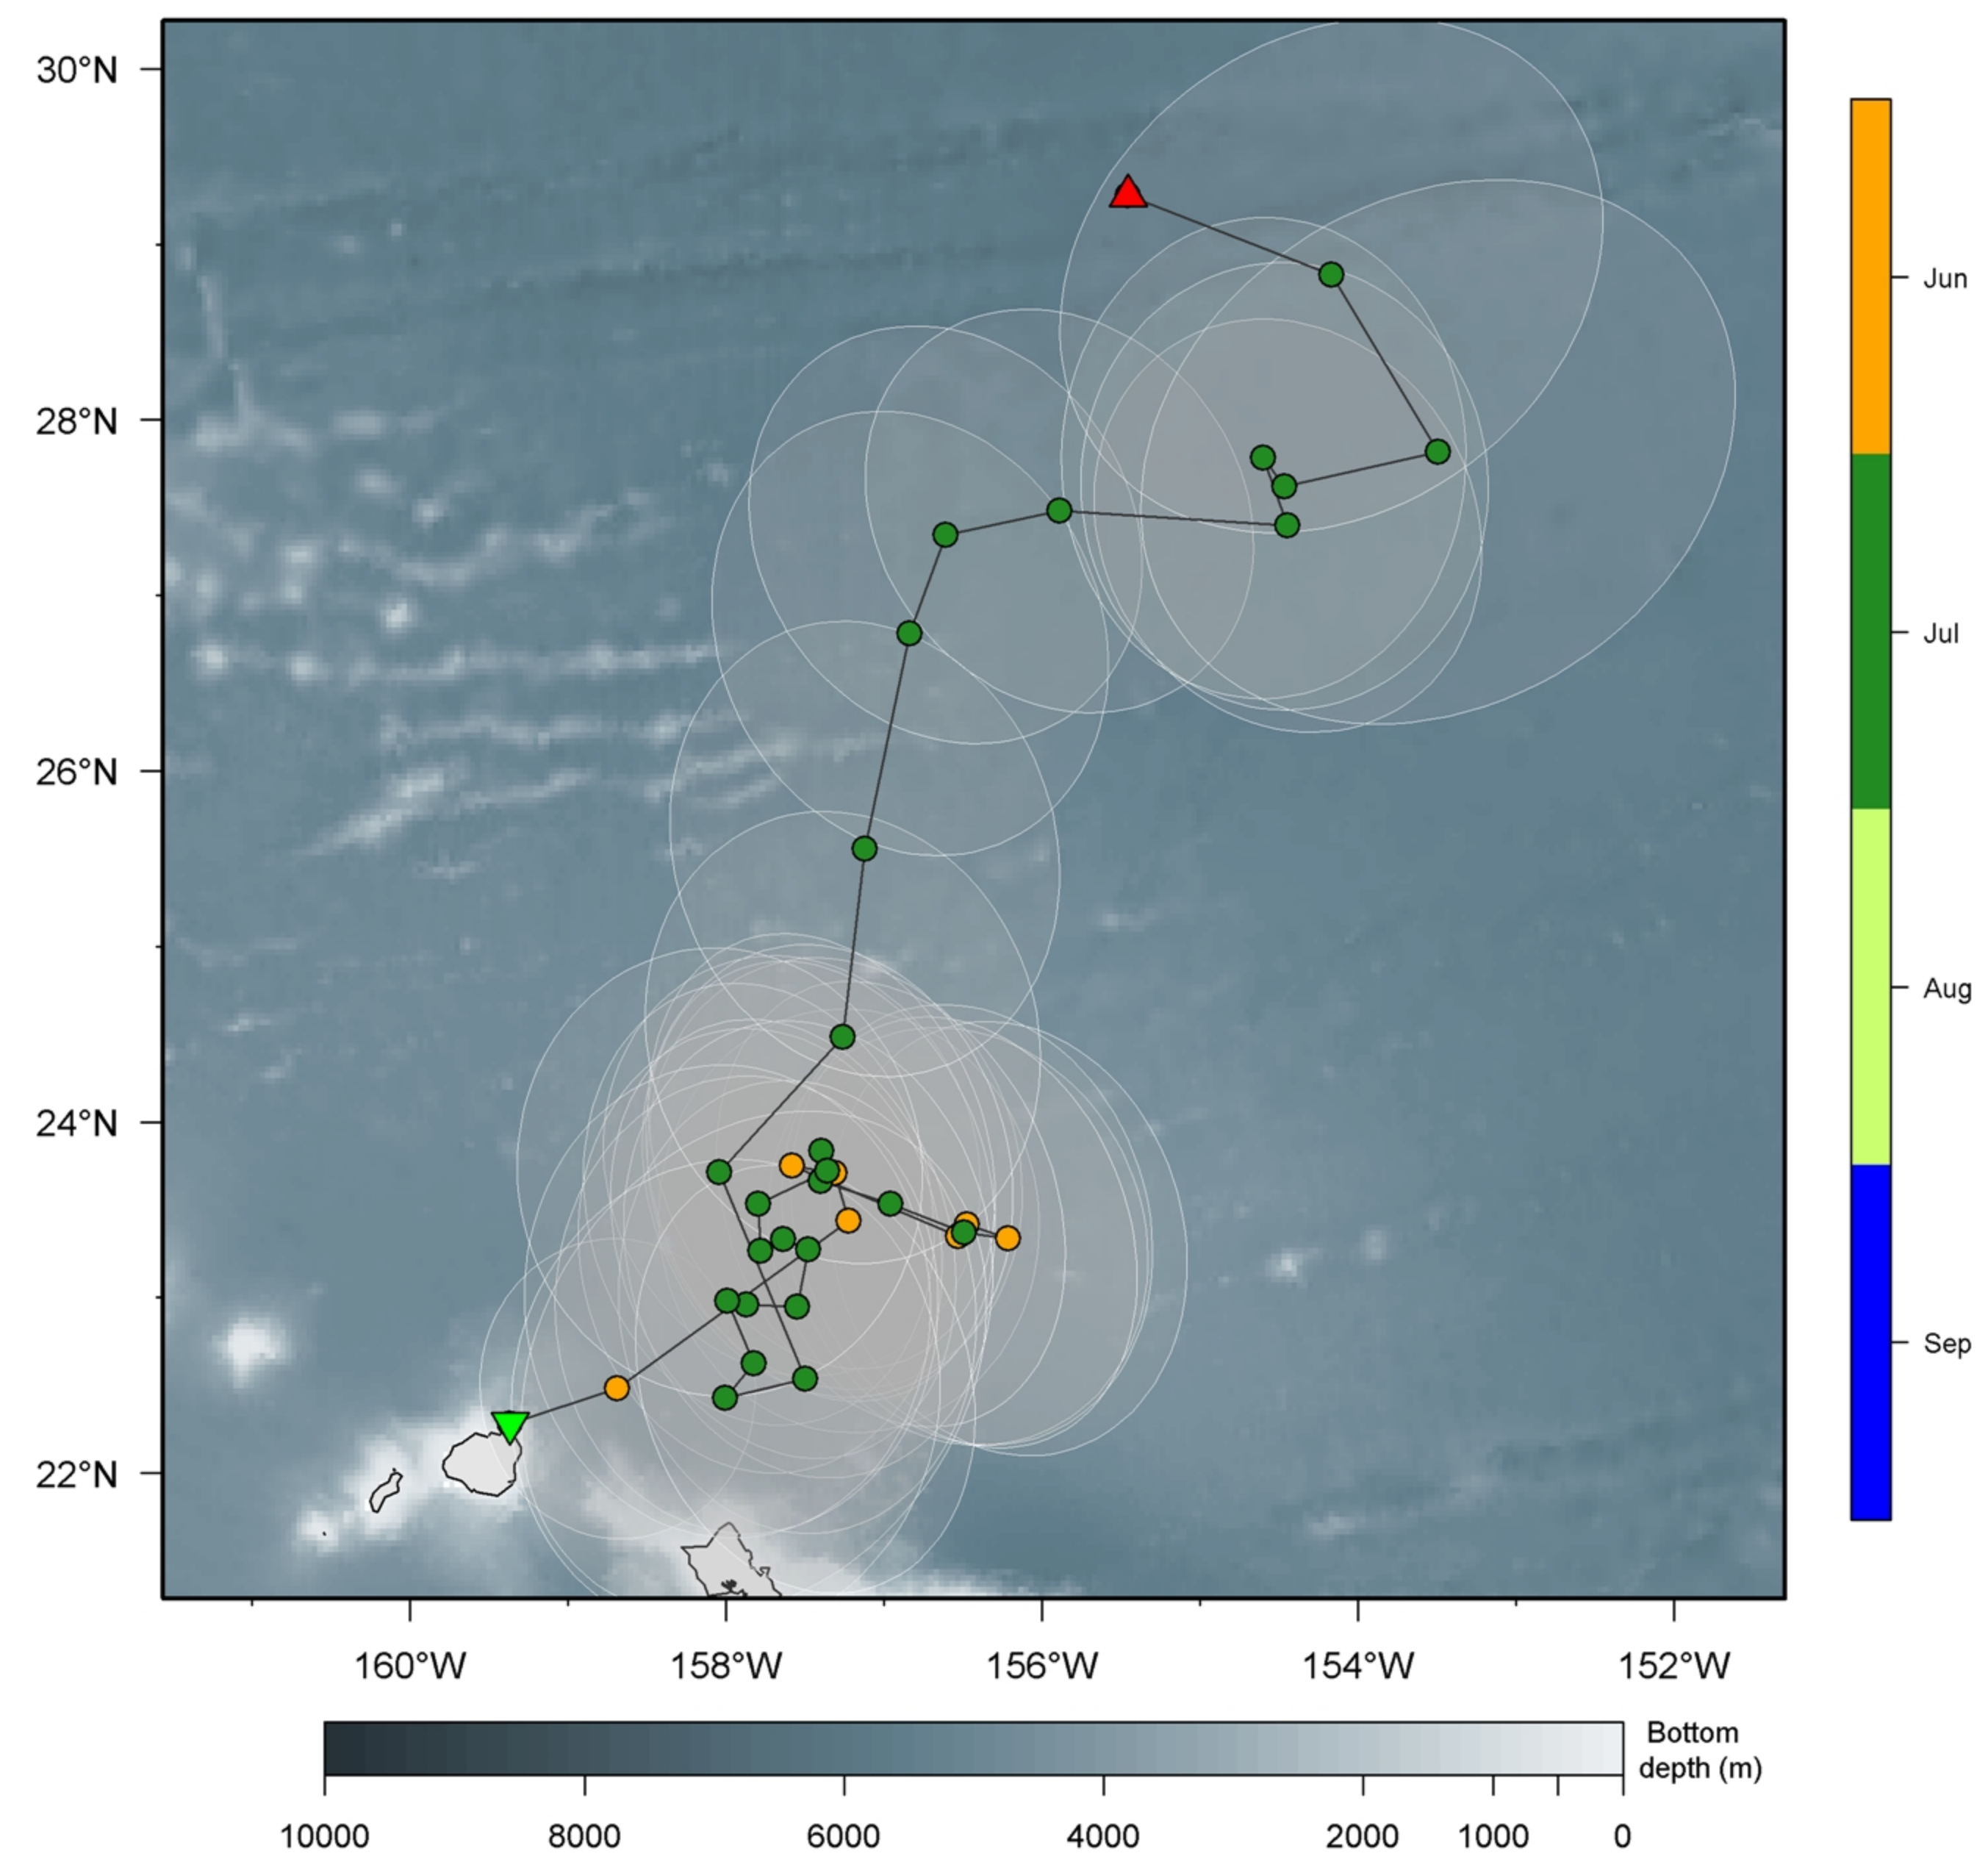

YFT.Tag16.15P1035.143809-ci

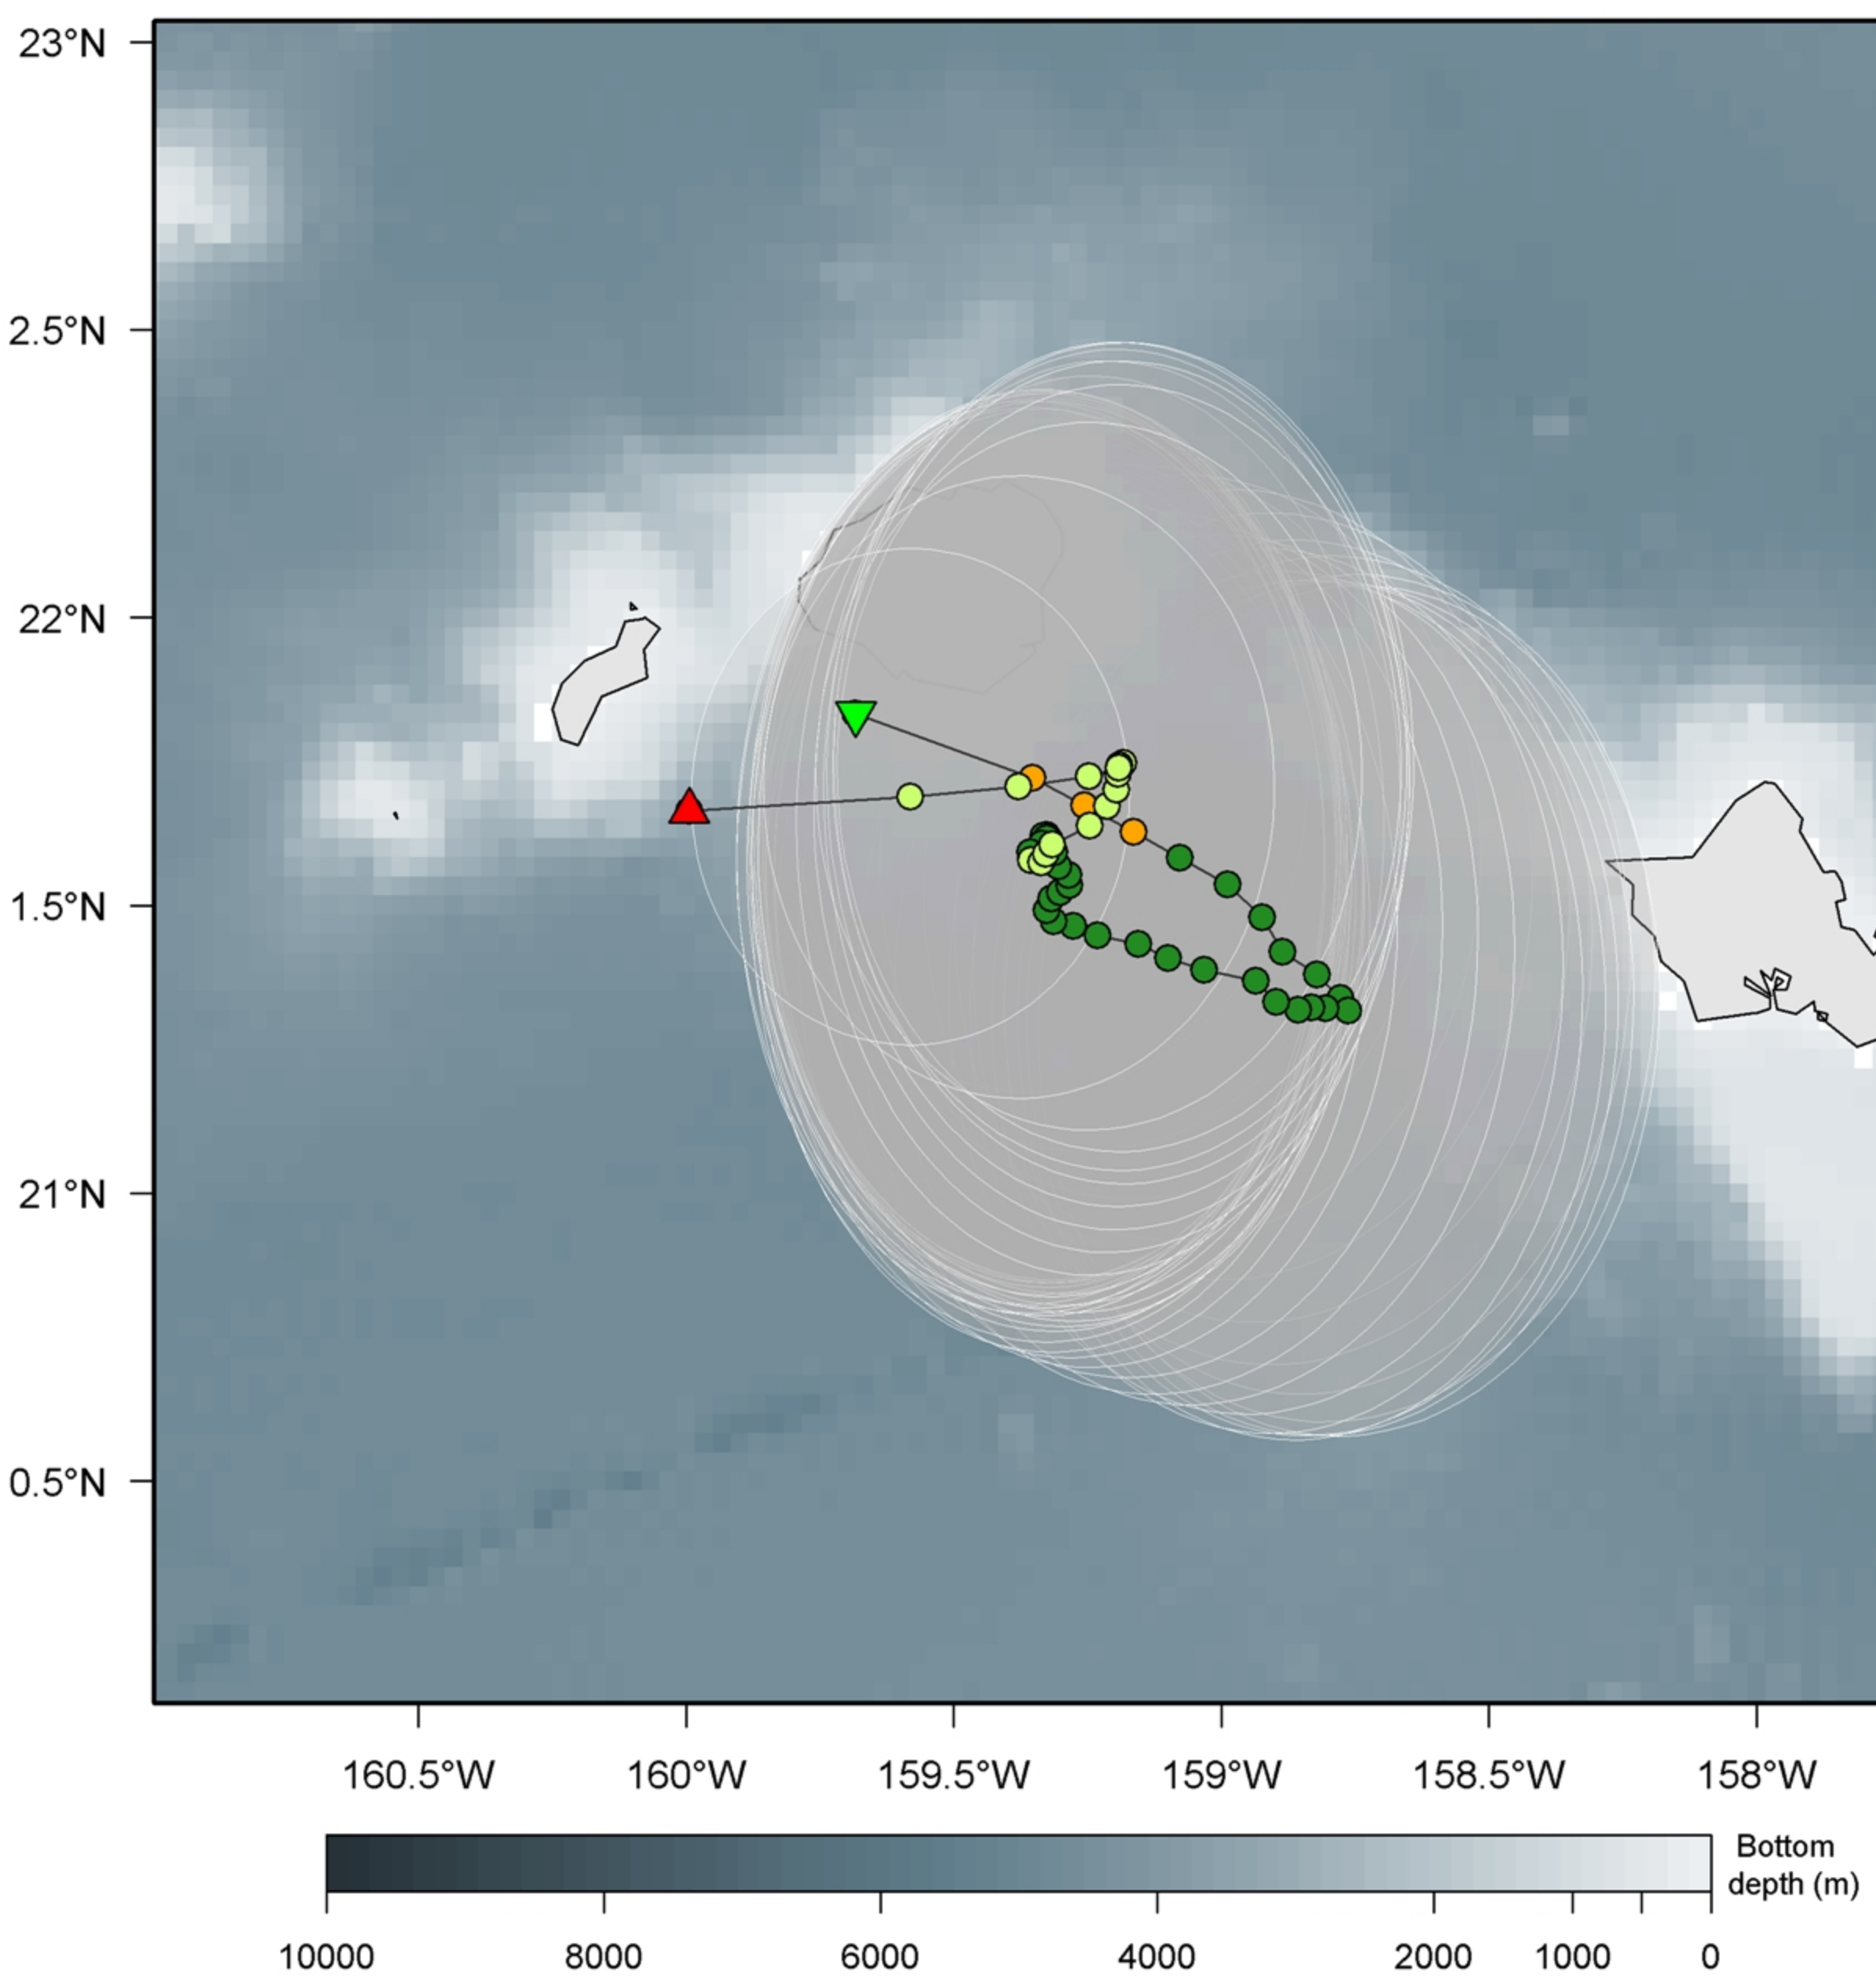

YFT.Tag17.16P1574.167341-ci
